# Supplementary material for: A nonlinear multi-proxy model based on manifold learning to reconstruct water temperature from high resolution trace element profiles in biogenic carbonates
Source: Copernicus journal article supplement (doi:10.5194/gmd-3-653-2010), 2010-11-12
Supplement: Supplementary file 1 [file GMDcoverletter.pdf › WDMRforGMD/GMDcoverletter.pdf]

Dear Mr., Mrs. Editor

I confirm my intent to participate in open access in your journal with the paper titled: "A nonlinear multi-proxy model based on manifold learning to reconstruct water temperature from high resolution trace element profiles in biogenic carbonates." In this paper we present a manifold based method called "Weight Determination Manifold Regularization (WDMR)" to create a nonlinear multi-proxy model to reconstruct water temperature by using Mg/Ca, Sr/Ca, Ba/Ca and Pb/Ca measurements on bivalve shells. To encourage readers to create nonlinear multi-proxy models for a broader scale of climate archives the WDMR toolbox for Matlab (R2007b) and the user manual for these codes, are added as supplementary material to this paper. Nevertheless we recommend contacting the authors to ensure the correct use of the WDMR toolbox.

Yours sincerely,  
Maïte Bauwens  
Vrije Universiteit Brussel  
Dept. ELEC  
Pleinlaan 2  
1050 Brussel – BELGIUM  
msbauwen@vub.ac.be
