# Supplementary material for: A nonlinear multi-proxy model based on manifold learning to reconstruct water temperature from high resolution trace element profiles in biogenic carbonates
Source: Copernicus journal article supplement (doi:10.5194/gmd-3-653-2010), 2010-11-12
Supplement: Supplementary file 1 [file TotalDataBeste2.xls]

## Sheet: terneuzen
Terneuzen	Terneuzen	Terneuzen	Terneuzen	Terneuzen	Terneuzen	Terneuzen	Mg	Sr	Ba	Pb
1	0	0	0	0	0	0	3.2529	1.10134	14.9058	0.316187	7.69167
1	0	0	0	0	0	0	3.24066	1.16114	21.5625	0.313487	8.04583
1	0	0	0	0	0	0	3.81352	1.21188	27.982	0.336061	8.47639
1	0	0	0	0	0	0	3.77318	1.25731	32.0862	0.273825	8.96458
1	0	0	0	0	0	0	5.42762	1.23039	28.7804	0.41615	9.18611
1	0	0	0	0	0	0	5.30156	1.22362	28.6061	0.315791	9.51528
1	0	0	0	0	0	0	6.19122	1.23611	30.5757	0.363587	9.92292
1	0	0	0	0	0	0	5.28004	1.25395	33.5587	0.412039	10.2458
1	0	0	0	0	0	0	5.07321	1.27723	34.694	0.385728	10.2826
1	0	0	0	0	0	0	5.80388	1.28297	36.0678	0.497171	10.3063
1	0	0	0	0	0	0	6.16055	1.3052	35.7989	0.622934	10.434
1	0	0	0	0	0	0	6.04414	1.31142	34.4428	1.51103	10.4415
1	0	0	0	0	0	0	6.09473	1.3035	29.0469	0.652449	10.2417
1	0	0	0	0	0	0	5.67145	1.2724	30.025	0.51492	10.3699
1	0	0	0	0	0	0	5.90151	1.27799	24.2604	0.450719	10.6368
1	0	0	0	0	0	0	6.1741	1.27593	15.6078	0.491138	10.7222
1	0	0	0	0	0	0	6.58548	1.26154	7.94517	0.60448	10.691
1	0	0	0	0	0	0	6.48993	1.30851	5.8303	0.568414	10.5889
1	0	0	0	0	0	0	6.52306	1.30881	4.01565	0.528945	10.634
1	0	0	0	0	0	0	6.40037	1.32639	2.89725	0.516325	10.7694
1	0	0	0	0	0	0	6.38325	1.33575	2.32657	0.631698	10.5799
1	0	0	0	0	0	0	7.01142	1.33092	2.236	0.718104	10.6069
1	0	0	0	0	0	0	6.23172	1.30507	2.14669	0.527145	10.4819
1	0	0	0	0	0	0	6.93752	1.33487	2.06092	0.640313	10.3257
1	0	0	0	0	0	0	6.95735	1.33135	1.99631	0.635634	10.3569
1	0	0	0	0	0	0	6.49191	1.31631	1.97559	0.552135	10.7361
1	0	0	0	0	0	0	6.64288	1.30409	2.01893	0.69925	10.9743
1	0	0	0	0	0	0	6.46787	1.25656	1.86006	0.46772	10.9875
1	0	0	0	0	0	0	6.78994	1.2999	2.11104	0.521697	11.0881
1	0	0	0	0	0	0	6.63297	1.27582	2.09556	0.475708	11.3826
1	0	0	0	0	0	0	6.94517	1.30156	2.30785	0.520571	11.8486
1	0	0	0	0	0	0	7.99124	1.35407	2.70789	0.654468	11.9646
1	0	0	0	0	0	0	8.1149	1.35525	2.98106	0.63873	12.059
1	0	0	0	0	0	0	7.74642	1.32608	2.89318	0.522116	12.4382
1	0	0	0	0	0	0	7.58422	1.34521	2.85198	0.62077	12.9104
1	0	0	0	0	0	0	7.48288	1.36058	3.01354	0.569515	13.3187
1	0	0	0	0	0	0	7.56591	1.33281	3.17422	0.495815	13.7299
1	0	0	0	0	0	0	8.87425	1.34492	3.04888	0.816949	14.0528
1	0	0	0	0	0	0	8.54483	1.36421	2.91419	0.70679	14.3187
1	0	0	0	0	0	0	9.99448	1.38714	3.33717	0.823696	14.7444
1	0	0	0	0	0	0	10.3006	1.39866	3.1484	0.804297	15.1472
1	0	0	0	0	0	0	9.709	1.39784	3.08953	0.848161	15.8944
1	0	0	0	0	0	0	9.90453	1.35286	2.97028	0.812776	16.0014
1	0	0	0	0	0	0	10.6812	1.35965	3.04046	1.02803	16.3208
1	0	0	0	0	0	0	10.2006	1.35031	2.92561	0.916996	16.7222
1	0	0	0	0	0	0	9.5657	1.34442	2.89885	0.840237	16.9611
1	0	0	0	0	0	0	10.1513	1.34002	2.36854	0.913394	17.0097
1	0	0	0	0	0	0	11.0995	1.3326	2.24456	0.924481	17.0542
1	0	0	0	0	0	0	11.6003	1.32763	2.11723	0.983763	17.2333
1	0	0	0	0	0	0	10.5566	1.35882	2.10193	0.800736	17.4292
1	0	0	0	0	0	0	9.89461	1.32223	2.19657	0.8036	17.5132
1	0	0	0	0	0	0	8.88838	1.3022	2.35774	0.629646	17.3285
1	0	0	0	0	0	0	7.47911	1.2663	1.82592	0.608467	16.909
1	0	0	0	0	0	0	6.54912	1.20259	2.19195	0.458236	16.6486
1	0	0	0	0	0	0	6.20275	1.18958	1.75802	0.594707	16.3639
1	0	0	0	0	0	0	5.57069	1.13697	1.50337	0.311358	16.1306
1	0	0	0	0	0	0	4.89113	1.08894	1.52209	0.274824	16.1222
1	0	0	0	0	0	0	4.69252	1.0831	1.39993	0.274261	16.3438
1	0	0	0	0	0	0	4.72792	1.06196	1.42443	0.326472	16.6757
1	0	0	0	0	0	0	5.74667	1.10147	1.5506	0.396622	16.4208
1	0	0	0	0	0	0	5.68799	1.11847	1.60436	0.408964	16.2035
0	1	0	0	0	0	0	3.7561	1.11376	31.3027	0.213735	7.69167
0	1	0	0	0	0	0	6.17638	1.15517	54.803	0.478704	8.04583
0	1	0	0	0	0	0	6.24634	1.17572	55.0361	0.49785	8.47639
0	1	0	0	0	0	0	6.71592	1.21146	54.5788	0.62952	8.78264
0	1	0	0	0	0	0	6.79896	1.20615	58.7527	0.668247	9.18611
0	1	0	0	0	0	0	6.80576	1.19161	35.2994	0.74629	9.51528
0	1	0	0	0	0	0	6.97167	1.22177	30.3017	0.772644	9.92292
0	1	0	0	0	0	0	6.41567	1.22403	40.8111	0.743144	10.2458
0	1	0	0	0	0	0	6.43033	1.2706	49.3199	0.719827	10.2826
0	1	0	0	0	0	0	6.39936	1.31763	55.2324	0.685884	10.2764
0	1	0	0	0	0	0	6.9129	1.23895	12.2241	0.747291	10.3063
0	1	0	0	0	0	0	7.22849	1.22997	7.54507	0.81902	10.4415
0	1	0	0	0	0	0	7.15734	1.27296	4.33977	0.754142	10.2417
0	1	0	0	0	0	0	7.25234	1.25602	4.00291	0.717948	10.3699
0	1	0	0	0	0	0	7.18695	1.26807	3.93021	0.648861	10.4611
0	1	0	0	0	0	0	6.94725	1.31861	4.62419	0.583115	10.6368
0	1	0	0	0	0	0	7.20629	1.33322	4.12457	0.668687	10.7222
0	1	0	0	0	0	0	6.73623	1.24657	2.31671	0.581847	10.691
0	1	0	0	0	0	0	6.94898	1.2754	2.12989	0.666469	10.634
0	1	0	0	0	0	0	6.65673	1.24795	1.98503	0.51653	10.7694
0	1	0	0	0	0	0	6.42724	1.2665	1.96346	0.40804	10.6174
0	1	0	0	0	0	0	6.36652	1.33758	2.02532	0.428001	10.5799
0	1	0	0	0	0	0	5.98888	1.22198	1.76999	0.441568	10.6069
0	1	0	0	0	0	0	5.97591	1.23777	2.07213	0.40602	10.4819
0	1	0	0	0	0	0	5.95949	1.23686	1.82612	0.387334	10.3257
0	1	0	0	0	0	0	5.78621	1.25835	1.98928	0.442945	10.4875
0	1	0	0	0	0	0	6.13578	1.27623	2.05658	0.390528	10.7361
0	1	0	0	0	0	0	6.43001	1.28116	2.25788	0.471606	10.9743
0	1	0	0	0	0	0	6.28756	1.26033	2.32206	0.412453	10.9875
0	1	0	0	0	0	0	6.9514	1.29196	2.5505	0.588892	11.0881
0	1	0	0	0	0	0	7.01506	1.30044	2.73088	0.582725	11.3826
0	1	0	0	0	0	0	7.41541	1.35896	3.29746	0.755982	11.8486
0	1	0	0	0	0	0	8.48563	1.37413	3.48197	0.859779	11.9646
0	1	0	0	0	0	0	9.04921	1.38037	4.32835	1.07555	12.059
0	1	0	0	0	0	0	8.91805	1.39529	4.29319	0.984756	12.4382
0	1	0	0	0	0	0	9.48984	1.39872	4.63904	1.05477	12.9104
0	1	0	0	0	0	0	9.36549	1.40275	4.50398	0.91882	13.3187
0	1	0	0	0	0	0	9.55638	1.42714	4.86705	0.751264	13.5174
0	1	0	0	0	0	0	10.3891	1.40252	5.33306	0.757071	14.0528
0	1	0	0	0	0	0	9.41534	1.38809	4.71164	0.645862	14.3187
0	1	0	0	0	0	0	10.1019	1.37397	3.75522	0.787976	14.7444
0	1	0	0	0	0	0	11.0026	1.34016	3.21763	1.12385	15.1472
0	1	0	0	0	0	0	11.2001	1.37689	3.18247	1.38753	15.6208
0	1	0	0	0	0	0	10.9749	1.33794	2.57768	1.16913	15.8944
0	1	0	0	0	0	0	11.0933	1.34819	2.45129	0.946039	16.0014
0	1	0	0	0	0	0	10.0302	1.33153	2.4368	0.863315	16.7222
0	1	0	0	0	0	0	10.5593	1.33613	2.57475	0.830268	16.9611
0	1	0	0	0	0	0	10.2623	1.31079	2.14405	0.731328	17.0097
0	1	0	0	0	0	0	10.8943	1.38435	2.51296	1.02048	17.034
0	1	0	0	0	0	0	9.95702	1.32623	2.2557	0.895707	17.0542
0	1	0	0	0	0	0	10.5223	1.36336	2.55135	0.830502	17.2333
0	1	0	0	0	0	0	8.5762	1.35758	2.34532	0.64183	17.4292
0	1	0	0	0	0	0	8.08682	1.28429	2.12596	0.63308	17.3285
0	1	0	0	0	0	0	6.90777	1.26807	1.95906	0.430811	17.1076
0	1	0	0	0	0	0	6.17939	1.20135	1.89722	0.484969	16.909
0	1	0	0	0	0	0	5.07986	1.2444	2.25764	0.43755	16.6486
0	1	0	0	0	0	0	6.244	1.23175	1.90349	0.395222	16.3639
0	1	0	0	0	0	0	6.17394	1.13714	1.53061	0.278273	16.1306
0	1	0	0	0	0	0	7.59734	1.18528	1.6359	0.484848	16.1222
0	1	0	0	0	0	0	8.12631	1.22935	2.8236	0.571091	16.6462
0	1	0	0	0	0	0	7.60819	1.26885	2.03786	0.652138	16.6757
0	1	0	0	0	0	0	7.07506	1.24526	1.89739	0.603	16.4208
0	1	0	0	0	0	0	6.43471	1.23187	2.0715	0.608097	16.2035
0	0	1	0	0	0	0	3.77723	1.14684	10.8255	0.50178	7.69167
0	0	1	0	0	0	0	4.75326	1.15265	20.3037	0.436539	8.04583
0	0	1	0	0	0	0	5.95901	1.19593	25.1624	0.359095	8.78264
0	0	1	0	0	0	0	5.91314	1.20665	27.714	0.498082	8.96458
0	0	1	0	0	0	0	6.37141	1.20324	27.3362	0.357117	9.18611
0	0	1	0	0	0	0	6.55942	1.20309	27.9414	0.498174	9.92292
0	0	1	0	0	0	0	6.6464	1.23498	30.5961	0.518567	10.2458
0	0	1	0	0	0	0	7.60386	1.2578	35.1468	0.720978	10.2826
0	0	1	0	0	0	0	7.72386	1.24198	33.4341	0.793055	10.3063
0	0	1	0	0	0	0	7.64213	1.28871	35.1016	0.782543	10.434
0	0	1	0	0	0	0	7.48327	1.29438	33.1374	0.863228	10.4415
0	0	1	0	0	0	0	7.42687	1.29903	25.0078	0.87318	10.2417
0	0	1	0	0	0	0	7.55119	1.36588	20.355	0.867039	10.4611
0	0	1	0	0	0	0	7.80923	1.34536	21.36	0.808397	10.6368
0	0	1	0	0	0	0	7.09849	1.3538	14.6159	0.740093	10.7222
0	0	1	0	0	0	0	7.20434	1.36537	9.09961	0.841462	10.5889
0	0	1	0	0	0	0	7.89663	1.38864	7.13959	0.936363	10.634
0	0	1	0	0	0	0	7.72677	1.39267	5.05262	0.791181	10.7694
0	0	1	0	0	0	0	7.4101	1.45195	3.89624	0.788696	10.5799
0	0	1	0	0	0	0	8.51592	1.49086	2.33362	1.09926	10.3569
0	0	1	0	0	0	0	9.07594	1.44836	2.39066	1.30192	10.4875
0	0	1	0	0	0	0	8.99889	1.47126	2.50321	1.18642	10.7361
0	0	1	0	0	0	0	8.44202	1.44769	2.49671	1.10221	10.9875
0	0	1	0	0	0	0	8.40036	1.46583	2.51205	0.96123	11.0881
0	0	1	0	0	0	0	8.29239	1.43671	2.46106	0.893025	11.3826
0	0	1	0	0	0	0	7.93835	1.46348	2.74046	0.930933	11.8486
0	0	1	0	0	0	0	8.50626	1.40093	2.94868	0.922926	11.9646
0	0	1	0	0	0	0	8.52058	1.44273	3.14293	0.95746	12.059
0	0	1	0	0	0	0	7.81562	1.42958	3.33422	0.761067	12.4382
0	0	1	0	0	0	0	7.20071	1.40828	3.21417	0.633302	13.3187
0	0	1	0	0	0	0	7.50246	1.56032	3.58277	0.826754	13.5174
0	0	1	0	0	0	0	8.7962	1.4137	3.18922	0.621963	13.7299
0	0	1	0	0	0	0	8.94119	1.53782	3.90311	0.954613	14.3187
0	0	1	0	0	0	0	9.05725	1.525	3.73699	0.996089	14.7444
0	0	1	0	0	0	0	10.3119	1.37558	3.28755	0.830584	15.1472
0	0	1	0	0	0	0	10.3916	1.39999	3.28523	0.844957	15.8944
0	0	1	0	0	0	0	10.4527	1.54879	4.1463	1.06492	16.0014
0	0	1	0	0	0	0	8.6306	1.38789	3.52692	0.864404	16.3208
0	0	1	0	0	0	0	10.281	1.43026	3.53998	1.2183	16.9611
0	0	1	0	0	0	0	11.0781	1.35746	3.24024	1.15693	17.0097
0	0	1	0	0	0	0	11.1531	1.38487	3.44471	1.31374	17.034
0	0	1	0	0	0	0	11.0348	1.34085	2.81032	1.29488	17.2333
0	0	1	0	0	0	0	11.6864	1.29107	1.99708	1.40799	17.4292
0	0	1	0	0	0	0	12.6628	1.31834	1.88361	1.68042	17.5132
0	0	1	0	0	0	0	12.5871	1.35003	1.93957	1.52	17.3285
0	0	1	0	0	0	0	12.1052	1.39553	1.98423	1.33477	16.909
0	0	1	0	0	0	0	10.9245	1.41851	2.19915	1.2068	16.6486
0	0	1	0	0	0	0	10.3177	1.48484	2.30832	0.967669	16.3639
0	0	1	0	0	0	0	9.14344	1.50723	2.61257	0.706383	16.1222
0	0	1	0	0	0	0	9.19084	1.47218	2.42857	0.480287	16.3438
0	0	1	0	0	0	0	4.92956	1.32007	1.98856	0.413746	16.6462
0	0	1	0	0	0	0	3.90118	1.30164	1.90373	0.410054	16.4208
0	0	1	0	0	0	0	4.95648	1.34559	2.26228	0.586454	16.2035
0	0	0	1	0	0	0	3.13838	1.09736	7.75538	0.524205	8.04583
0	0	0	1	0	0	0	3.4184	1.14142	14.7104	0.38964	8.47639
0	0	0	1	0	0	0	3.96775	1.19018	22.7386	0.376693	8.96458
0	0	0	1	0	0	0	5.17869	1.28717	30.3963	0.442066	9.18611
0	0	0	1	0	0	0	6.07068	1.31527	34.6737	0.60665	9.92292
0	0	0	1	0	0	0	6.80572	1.34268	40.7159	0.722689	10.2458
0	0	0	1	0	0	0	7.09912	1.37367	47.8749	0.814225	10.2764
0	0	0	1	0	0	0	7.29338	1.41036	48.3633	0.973105	10.434
0	0	0	1	0	0	0	6.91775	1.44209	49.2282	0.872023	10.4415
0	0	0	1	0	0	0	6.45281	1.44356	49.2494	1.00952	10.3699
0	0	0	1	0	0	0	6.72633	1.48898	27.6402	0.991925	10.4611
0	0	0	1	0	0	0	7.1322	1.4269	11.3893	1.18406	10.7222
0	0	0	1	0	0	0	6.40984	1.448	4.4889	1.14306	10.691
0	0	0	1	0	0	0	5.73821	1.34743	2.86651	0.904451	10.634
0	0	0	1	0	0	0	4.9989	1.15906	2.18198	0.514391	10.7694
0	0	0	1	0	0	0	5.66357	1.12768	2.24144	0.540259	10.5799
0	0	0	1	0	0	0	5.82267	1.22326	2.81484	0.584618	10.4819
0	0	0	1	0	0	0	7.13379	1.29782	3.23706	0.642397	10.3257
0	0	0	1	0	0	0	8.08658	1.41062	3.75365	0.764895	10.4875
0	0	0	1	0	0	0	9.62209	1.4429	4.36167	0.894892	10.7361
0	0	0	1	0	0	0	10.5335	1.51201	4.95442	1.01306	10.9875
0	0	0	1	0	0	0	9.80522	1.48588	4.68693	0.815989	11.0881
0	0	0	1	0	0	0	10.7345	1.51509	4.55804	1.00266	11.6326
0	0	0	1	0	0	0	11.1439	1.49391	4.30428	0.842792	11.9646
0	0	0	1	0	0	0	10.9555	1.50149	3.98589	0.640563	12.059
0	0	0	1	0	0	0	10.617	1.49484	3.78954	0.704653	12.9104
0	0	0	1	0	0	0	12.1698	1.49661	3.36903	0.813618	13.3187
0	0	0	1	0	0	0	11.9985	1.46963	2.86395	0.805949	13.7299
0	0	0	1	0	0	0	11.6618	1.4569	2.59112	0.721527	14.0528
0	0	0	1	0	0	0	12.5965	1.47221	2.75129	0.770491	14.7444
0	0	0	1	0	0	0	12.3391	1.46709	2.57475	0.655787	15.6208
0	0	0	1	0	0	0	12.1293	1.47682	2.5656	0.557885	15.8944
0	0	0	1	0	0	0	11.3316	1.43835	2.37864	0.586979	16.3208
0	0	0	1	0	0	0	10.2075	1.42223	2.24402	0.618927	16.7222
0	0	0	1	0	0	0	10.1241	1.4008	2.26778	0.739478	17.0097
0	0	0	1	0	0	0	9.60137	1.39418	2.20248	0.669122	17.034
0	0	0	1	0	0	0	9.31857	1.36143	2.17637	1.02527	17.2333
0	0	0	1	0	0	0	9.08799	1.318	1.98123	0.689744	17.4292
0	0	0	1	0	0	0	8.51971	1.2817	2.03915	0.52309	17.3285
0	0	0	1	0	0	0	7.30665	1.23753	1.83058	0.685325	16.909
0	0	0	1	0	0	0	6.65019	1.22799	1.87808	0.565704	16.6486
0	0	0	1	0	0	0	6.20795	1.17428	1.72258	0.36076	16.1306
0	0	0	1	0	0	0	5.65208	1.21591	1.80619	0.407756	16.1222
0	0	0	1	0	0	0	4.64773	1.1037	1.6412	0.354778	16.6462
0	0	0	1	0	0	0	5.29239	1.0951	1.70221	0.369058	16.6757
0	0	0	1	0	0	0	5.27108	1.07917	1.97544	0.339189	16.2035
0	0	0	0	1	0	0	4.13314	1.11632	3.72961	0.214771	8.04583
0	0	0	0	1	0	0	3.99583	1.02423	10.3294	0.303648	8.47639
0	0	0	0	1	0	0	5.01958	1.11029	27.0625	0.366094	8.96458
0	0	0	0	1	0	0	5.11141	1.14105	30.6015	0.295775	9.18611
0	0	0	0	1	0	0	5.29771	1.17981	34.4969	0.327519	9.92292
0	0	0	0	1	0	0	5.40015	1.20632	43.2549	0.389867	10.2458
0	0	0	0	1	0	0	5.7574	1.1961	45.1943	0.402853	10.2764
0	0	0	0	1	0	0	6.06959	1.23279	55.0442	0.493878	10.434
0	0	0	0	1	0	0	6.06504	1.25252	57.1118	0.504041	10.4415
0	0	0	0	1	0	0	6.05891	1.25317	58.6531	0.607567	10.3699
0	0	0	0	1	0	0	5.71845	1.22757	52.2341	0.602183	10.4611
0	0	0	0	1	0	0	5.89198	1.23838	46.1517	0.580014	10.7222
0	0	0	0	1	0	0	5.83538	1.2036	31.0487	0.607234	10.691
0	0	0	0	1	0	0	6.0246	1.24534	22.9111	0.609593	10.634
0	0	0	0	1	0	0	5.88053	1.23272	11.8389	0.638316	10.7694
0	0	0	0	1	0	0	5.82878	1.26654	8.08795	0.593794	10.5799
0	0	0	0	1	0	0	5.73227	1.28576	5.00059	0.601794	10.4819
0	0	0	0	1	0	0	5.6601	1.25603	3.32086	0.496124	10.3257
0	0	0	0	1	0	0	6.00259	1.25848	2.2629	0.688809	10.4875
0	0	0	0	1	0	0	5.93828	1.29004	2.07012	0.893573	10.7361
0	0	0	0	1	0	0	5.9007	1.29342	1.93305	0.584133	10.9875
0	0	0	0	1	0	0	6.29869	1.28777	1.80044	0.666495	11.0881
0	0	0	0	1	0	0	6.6598	1.29563	1.96161	0.743906	11.6326
0	0	0	0	1	0	0	6.40148	1.2795	1.84865	0.628668	11.9646
0	0	0	0	1	0	0	5.89365	1.26039	1.89893	0.522528	12.059
0	0	0	0	1	0	0	5.41654	1.26532	2.02767	0.508855	12.9104
0	0	0	0	1	0	0	6.43199	1.30655	2.53378	0.686306	13.3187
0	0	0	0	1	0	0	7.02014	1.30636	2.74146	0.604436	13.7299
0	0	0	0	1	0	0	7.43195	1.33666	2.96667	0.692368	14.0528
0	0	0	0	1	0	0	7.97487	1.446	3.6917	0.879497	14.7444
0	0	0	0	1	0	0	8.99831	1.30724	3.71087	1.14501	15.6208
0	0	0	0	1	0	0	8.58598	1.25271	2.96793	0.982919	15.8944
0	0	0	0	1	0	0	8.76136	1.33459	3.06177	0.964125	16.3208
0	0	0	0	1	0	0	8.49105	1.36394	3.47873	1.11067	16.7222
0	0	0	0	1	0	0	8.31784	1.3315	3.29621	1.06861	17.0097
0	0	0	0	1	0	0	8.63625	1.28119	2.38641	0.932563	17.034
0	0	0	0	1	0	0	8.19637	1.29631	2.3827	1.02194	17.2333
0	0	0	0	1	0	0	8.76317	1.29458	2.12742	1.0104	17.4292
0	0	0	0	1	0	0	7.97044	1.29388	2.01009	0.990066	17.3285
0	0	0	0	1	0	0	8.0642	1.27015	1.81608	1.03294	16.909
0	0	0	0	1	0	0	7.38588	1.23914	1.73146	0.707825	16.6486
0	0	0	0	1	0	0	6.56532	1.18906	1.56514	0.623672	16.1306
0	0	0	0	1	0	0	5.38237	1.12589	1.4473	0.564314	16.1222
0	0	0	0	1	0	0	4.3945	1.03833	1.14608	0.494259	16.6462
0	0	0	0	1	0	0	4.51549	1.00315	1.06727	0.381777	16.6757
0	0	0	0	1	0	0	3.31217	1.02927	1.31689	0.268462	16.2035
0	0	0	0	1	0	0	4.09063	1.11105	1.42375	0.404172	16.2688
0	0	0	0	0	1	0	3.96316	1.26612	4.83045	0.332471	8.04583
0	0	0	0	0	1	0	4.56643	1.24861	14.14	0.47539	8.78264
0	0	0	0	0	1	0	5.25134	1.31666	26.07	0.580255	9.18611
0	0	0	0	0	1	0	6.8152	1.30442	44.0976	0.573926	9.92292
0	0	0	0	0	1	0	6.43866	1.35415	52.228	0.523318	10.2458
0	0	0	0	0	1	0	6.08439	1.32442	50.4855	0.511773	10.2764
0	0	0	0	0	1	0	5.86774	1.32193	58.9697	0.517248	10.434
0	0	0	0	0	1	0	6.0592	1.31406	69.7409	0.494653	10.2417
0	0	0	0	0	1	0	6.46784	1.33184	67.7113	0.685617	10.4611
0	0	0	0	0	1	0	6.36449	1.365	73.0028	0.598533	10.7222
0	0	0	0	0	1	0	6.3131	1.36609	59.7892	0.684155	10.5889
0	0	0	0	0	1	0	6.29563	1.41589	51.2372	0.716497	10.7694
0	0	0	0	0	1	0	6.77828	1.47033	31.9426	0.691878	10.5799
0	0	0	0	0	1	0	6.89748	1.39812	15.1003	0.585756	10.4819
0	0	0	0	0	1	0	7.21518	1.38966	5.86015	0.558297	10.3257
0	0	0	0	0	1	0	6.62358	1.38538	3.03769	0.604654	10.4875
0	0	0	0	0	1	0	6.28338	1.38417	2.65352	0.505199	10.9743
0	0	0	0	0	1	0	6.71736	1.42842	2.55747	0.484236	11.0881
0	0	0	0	0	1	0	7.32169	1.45656	2.58388	0.622846	11.6326
0	0	0	0	0	1	0	7.32722	1.41838	2.51444	0.582839	11.9646
0	0	0	0	0	1	0	8.11284	1.43538	2.62578	0.705907	12.4382
0	0	0	0	0	1	0	8.01199	1.44687	2.89696	0.627753	13.3187
0	0	0	0	0	1	0	7.12446	1.45353	3.53497	0.729905	13.7299
0	0	0	0	0	1	0	7.62125	1.52048	3.46919	0.906528	14.0528
0	0	0	0	0	1	0	8.72443	1.43624	3.13957	0.879069	14.7444
0	0	0	0	0	1	0	8.28354	1.42708	3.14838	0.710532	15.6208
0	0	0	0	0	1	0	9.84082	1.45485	3.45407	0.941529	16.0014
0	0	0	0	0	1	0	9.75348	1.46679	3.16936	0.794661	16.7222
0	0	0	0	0	1	0	9.67491	1.63862	3.7616	0.923645	17.0097
0	0	0	0	0	1	0	8.11615	1.35853	2.9932	0.709943	17.0542
0	0	0	0	0	1	0	6.54525	1.12126	2.03857	0.419841	17.4292
0	0	0	0	0	1	0	7.74781	1.14023	2.17887	0.576601	17.3285
0	0	0	0	0	1	0	6.55692	1.15208	1.77806	0.363785	16.909
0	0	0	0	0	1	0	8.42887	1.23541	1.96629	0.539089	16.6486
0	0	0	0	0	1	0	8.26109	1.30762	2.14586	0.680196	16.1306
0	0	0	0	0	1	0	6.91811	1.34693	2.38409	0.796015	16.3438
0	0	0	0	0	1	0	7.23949	1.42014	2.78523	0.644019	16.6757
0	0	0	0	0	1	0	7.32276	1.35134	2.37125	0.560972	16.2035
0	0	0	0	0	1	0	7.80295	1.24996	2.43987	0.72575	16.1687
0	0	0	0	0	0	1	3.24673	1.07021	4.94121	0.228645	7.69167
0	0	0	0	0	0	1	3.54469	1.14385	22.2091	0.297444	8.04583
0	0	0	0	0	0	1	3.60227	1.14415	29.5864	0.28692	8.47639
0	0	0	0	0	0	1	4.50108	1.24438	38.3345	0.281984	8.96458
0	0	0	0	0	0	1	5.14207	1.24528	39.2589	0.403231	9.18611
0	0	0	0	0	0	1	6.02628	1.21923	35.4485	0.428591	9.51528
0	0	0	0	0	0	1	6.49324	1.27368	41.0061	0.504733	9.92292
0	0	0	0	0	0	1	7.02745	1.30281	43.9197	0.476273	10.2826
0	0	0	0	0	0	1	6.8844	1.32817	47.493	0.547852	10.2764
0	0	0	0	0	0	1	6.35967	1.28817	47.9905	0.542969	10.3063
0	0	0	0	0	0	1	6.15389	1.29656	42.017	0.596398	10.434
0	0	0	0	0	0	1	6.29093	1.25736	34.876	0.620694	10.4415
0	0	0	0	0	0	1	6.51566	1.26095	22.6042	0.644803	10.3699
0	0	0	0	0	0	1	6.86898	1.25118	15.6804	0.689816	10.4611
0	0	0	0	0	0	1	6.81178	1.28163	10.3714	0.635815	10.6368
0	0	0	0	0	0	1	6.97365	1.27587	7.94126	0.720909	10.7222
0	0	0	0	0	0	1	7.01105	1.25899	4.75912	0.630339	10.5889
0	0	0	0	0	0	1	7.3605	1.28272	3.29375	0.719541	10.634
0	0	0	0	0	0	1	7.2486	1.29074	2.83572	0.636853	10.7694
0	0	0	0	0	0	1	7.18789	1.30156	2.39316	0.780041	10.6174
0	0	0	0	0	0	1	7.11146	1.30459	2.39801	0.711898	10.5799
0	0	0	0	0	0	1	7.37654	1.30983	2.13399	0.782036	10.4819
0	0	0	0	0	0	1	7.28549	1.2707	1.99523	0.670664	10.3257
0	0	0	0	0	0	1	7.43544	1.28355	2.15667	0.642862	10.3569
0	0	0	0	0	0	1	7.04291	1.30235	2.07269	0.494035	10.4875
0	0	0	0	0	0	1	7.57015	1.41166	2.31862	0.526888	10.9875
0	0	0	0	0	0	1	7.36985	1.34976	2.76799	0.586175	11.0881
0	0	0	0	0	0	1	8.07213	1.37159	2.98892	0.687938	11.3826
0	0	0	0	0	0	1	8.32718	1.36469	3.02908	0.674731	11.8486
0	0	0	0	0	0	1	8.69266	1.41662	3.2094	0.679263	11.9646
0	0	0	0	0	0	1	8.73131	1.39153	3.12949	0.717145	12.059
0	0	0	0	0	0	1	9.12457	1.37413	3.48462	0.677684	12.4382
0	0	0	0	0	0	1	9.23375	1.38585	3.52948	0.759283	12.9104
0	0	0	0	0	0	1	8.84191	1.3988	3.53185	0.711572	13.5174
0	0	0	0	0	0	1	9.80221	1.42758	3.67838	0.803058	13.7299
0	0	0	0	0	0	1	9.92072	1.44329	3.80934	0.873141	14.0528
0	0	0	0	0	0	1	9.52952	1.38958	3.65741	0.746706	14.3187
0	0	0	0	0	0	1	10.1509	1.4096	3.74125	0.672609	15.1472
0	0	0	0	0	0	1	10.4682	1.39427	3.82349	0.729334	15.6208
0	0	0	0	0	0	1	10.3942	1.38309	3.63756	0.771276	15.8944
0	0	0	0	0	0	1	10.6221	1.42272	3.392	0.679599	16.0014
0	0	0	0	0	0	1	9.63052	1.36782	3.14877	0.664821	16.3208
0	0	0	0	0	0	1	9.34097	1.32702	2.84265	0.653958	16.9611
0	0	0	0	0	0	1	9.14177	1.33351	2.63057	0.662706	17.0097
0	0	0	0	0	0	1	9.10817	1.35739	2.23817	0.636827	17.034
0	0	0	0	0	0	1	9.58285	1.30157	2.05365	0.697562	17.0542
0	0	0	0	0	0	1	9.8462	1.31367	2.15101	0.705821	17.4292
0	0	0	0	0	0	1	9.59854	1.30437	1.98752	0.577686	17.5132
0	0	0	0	0	0	1	8.04395	1.28587	2.01954	0.464236	17.3285
0	0	0	0	0	0	1	7.52704	1.24243	1.72188	0.365699	17.1076
0	0	0	0	0	0	1	7.53503	1.19941	1.6379	0.447295	16.909
0	0	0	0	0	0	1	7.65468	1.211	1.67932	0.402617	16.3639
0	0	0	0	0	0	1	7.36966	1.16389	1.49424	0.374723	16.1306
0	0	0	0	0	0	1	6.61739	1.17972	1.52253	0.368982	16.1222
0	0	0	0	0	0	1	6.58962	1.17535	1.37825	0.326326	16.3438
0	0	0	0	0	0	1	6.77124	1.1788	1.55225	0.302092	16.6757
0	0	0	0	0	0	1	6.37133	1.16241	1.50444	0.294547	16.4208
0	0	0	0	0	0	1	6.90856	1.17831	1.56037	0.327629	16.2035

## Sheet: test bres
1	0	0	0	0	0	0	3.2529	1.10134	14.9058	0.316187	7.69167
1	0	0	0	0	0	0	3.24066	1.16114	21.5625	0.313487	8.04583
1	0	0	0	0	0	0	3.81352	1.21188	27.982	0.336061	8.47639
1	0	0	0	0	0	0	3.77318	1.25731	32.0862	0.273825	8.96458
1	0	0	0	0	0	0	5.42762	1.23039	28.7804	0.41615	9.18611
1	0	0	0	0	0	0	5.30156	1.22362	28.6061	0.315791	9.51528
1	0	0	0	0	0	0	6.19122	1.23611	30.5757	0.363587	9.92292
1	0	0	0	0	0	0	5.28004	1.25395	33.5587	0.412039	10.2458
1	0	0	0	0	0	0	5.07321	1.27723	34.694	0.385728	10.2826
1	0	0	0	0	0	0	5.80388	1.28297	36.0678	0.497171	10.3063
1	0	0	0	0	0	0	6.16055	1.3052	35.7989	0.622934	10.434
1	0	0	0	0	0	0	6.04414	1.31142	34.4428	1.51103	10.4415
1	0	0	0	0	0	0	6.09473	1.3035	29.0469	0.652449	10.2417
1	0	0	0	0	0	0	5.67145	1.2724	30.025	0.51492	10.3699
1	0	0	0	0	0	0	5.90151	1.27799	24.2604	0.450719	10.6368
1	0	0	0	0	0	0	6.1741	1.27593	15.6078	0.491138	10.7222
1	0	0	0	0	0	0	6.58548	1.26154	7.94517	0.60448	10.691
1	0	0	0	0	0	0	6.48993	1.30851	5.8303	0.568414	10.5889
1	0	0	0	0	0	0	6.52306	1.30881	4.01565	0.528945	10.634
1	0	0	0	0	0	0	6.40037	1.32639	2.89725	0.516325	10.7694
1	0	0	0	0	0	0	6.38325	1.33575	2.32657	0.631698	10.5799
1	0	0	0	0	0	0	7.01142	1.33092	2.236	0.718104	10.6069
1	0	0	0	0	0	0	6.23172	1.30507	2.14669	0.527145	10.4819
1	0	0	0	0	0	0	6.93752	1.33487	2.06092	0.640313	10.3257
1	0	0	0	0	0	0	6.95735	1.33135	1.99631	0.635634	10.3569
1	0	0	0	0	0	0	6.49191	1.31631	1.97559	0.552135	10.7361
1	0	0	0	0	0	0	6.64288	1.30409	2.01893	0.69925	10.9743
1	0	0	0	0	0	0	6.46787	1.25656	1.86006	0.46772	10.9875
1	0	0	0	0	0	0	6.78994	1.2999	2.11104	0.521697	11.0881
1	0	0	0	0	0	0	6.63297	1.27582	2.09556	0.475708	11.3826
1	0	0	0	0	0	0	6.94517	1.30156	2.30785	0.520571	11.8486
1	0	0	0	0	0	0	7.99124	1.35407	2.70789	0.654468	11.9646
1	0	0	0	0	0	0	8.1149	1.35525	2.98106	0.63873	12.059
1	0	0	0	0	0	0	7.74642	1.32608	2.89318	0.522116	12.4382
1	0	0	0	0	0	0	7.58422	1.34521	2.85198	0.62077	12.9104
1	0	0	0	0	0	0	7.48288	1.36058	3.01354	0.569515	13.3187
1	0	0	0	0	0	0	7.56591	1.33281	3.17422	0.495815	13.7299
1	0	0	0	0	0	0	8.87425	1.34492	3.04888	0.816949	14.0528
1	0	0	0	0	0	0	8.54483	1.36421	2.91419	0.70679	14.3187
1	0	0	0	0	0	0	9.99448	1.38714	3.33717	0.823696	14.7444
1	0	0	0	0	0	0	10.3006	1.39866	3.1484	0.804297	15.1472
1	0	0	0	0	0	0	9.709	1.39784	3.08953	0.848161	15.8944
1	0	0	0	0	0	0	9.90453	1.35286	2.97028	0.812776	16.0014
1	0	0	0	0	0	0	10.6812	1.35965	3.04046	1.02803	16.3208
1	0	0	0	0	0	0	10.2006	1.35031	2.92561	0.916996	16.7222
1	0	0	0	0	0	0	9.5657	1.34442	2.89885	0.840237	16.9611
1	0	0	0	0	0	0	10.1513	1.34002	2.36854	0.913394	17.0097
1	0	0	0	0	0	0	11.0995	1.3326	2.24456	0.924481	17.0542
1	0	0	0	0	0	0	11.6003	1.32763	2.11723	0.983763	17.2333
1	0	0	0	0	0	0	10.5566	1.35882	2.10193	0.800736	17.4292
1	0	0	0	0	0	0	9.89461	1.32223	2.19657	0.8036	17.5132
1	0	0	0	0	0	0	8.88838	1.3022	2.35774	0.629646	17.3285
1	0	0	0	0	0	0	7.47911	1.2663	1.82592	0.608467	16.909
1	0	0	0	0	0	0	6.54912	1.20259	2.19195	0.458236	16.6486
1	0	0	0	0	0	0	6.20275	1.18958	1.75802	0.594707	16.3639
1	0	0	0	0	0	0	5.57069	1.13697	1.50337	0.311358	16.1306
1	0	0	0	0	0	0	4.89113	1.08894	1.52209	0.274824	16.1222
1	0	0	0	0	0	0	4.69252	1.0831	1.39993	0.274261	16.3438
1	0	0	0	0	0	0	4.72792	1.06196	1.42443	0.326472	16.6757
1	0	0	0	0	0	0	5.74667	1.10147	1.5506	0.396622	16.4208
1	0	0	0	0	0	0	5.68799	1.11847	1.60436	0.408964	16.2035
0	1	0	0	0	0	0	3.7561	1.11376	31.3027	0.213735	7.69167
0	1	0	0	0	0	0	6.17638	1.15517	54.803	0.478704	8.04583
0	1	0	0	0	0	0	6.24634	1.17572	55.0361	0.49785	8.47639
0	1	0	0	0	0	0	6.71592	1.21146	54.5788	0.62952	8.78264
0	1	0	0	0	0	0	6.79896	1.20615	58.7527	0.668247	9.18611
0	1	0	0	0	0	0	6.80576	1.19161	35.2994	0.74629	9.51528
0	1	0	0	0	0	0	6.97167	1.22177	30.3017	0.772644	9.92292
0	1	0	0	0	0	0	6.41567	1.22403	40.8111	0.743144	10.2458
0	1	0	0	0	0	0	6.43033	1.2706	49.3199	0.719827	10.2826
0	1	0	0	0	0	0	6.39936	1.31763	55.2324	0.685884	10.2764
0	1	0	0	0	0	0	6.9129	1.23895	12.2241	0.747291	10.3063
0	1	0	0	0	0	0	7.22849	1.22997	7.54507	0.81902	10.4415
0	1	0	0	0	0	0	7.15734	1.27296	4.33977	0.754142	10.2417
0	1	0	0	0	0	0	7.25234	1.25602	4.00291	0.717948	10.3699
0	1	0	0	0	0	0	7.18695	1.26807	3.93021	0.648861	10.4611
0	1	0	0	0	0	0	6.94725	1.31861	4.62419	0.583115	10.6368
0	1	0	0	0	0	0	7.20629	1.33322	4.12457	0.668687	10.7222
0	1	0	0	0	0	0	6.73623	1.24657	2.31671	0.581847	10.691
0	1	0	0	0	0	0	6.94898	1.2754	2.12989	0.666469	10.634
0	1	0	0	0	0	0	6.65673	1.24795	1.98503	0.51653	10.7694
0	1	0	0	0	0	0	6.42724	1.2665	1.96346	0.40804	10.6174
0	1	0	0	0	0	0	6.36652	1.33758	2.02532	0.428001	10.5799
0	1	0	0	0	0	0	5.98888	1.22198	1.76999	0.441568	10.6069
0	1	0	0	0	0	0	5.97591	1.23777	2.07213	0.40602	10.4819
0	1	0	0	0	0	0	5.95949	1.23686	1.82612	0.387334	10.3257
0	1	0	0	0	0	0	5.78621	1.25835	1.98928	0.442945	10.4875
0	1	0	0	0	0	0	6.13578	1.27623	2.05658	0.390528	10.7361
0	1	0	0	0	0	0	6.43001	1.28116	2.25788	0.471606	10.9743
0	1	0	0	0	0	0	6.28756	1.26033	2.32206	0.412453	10.9875
0	1	0	0	0	0	0	6.9514	1.29196	2.5505	0.588892	11.0881
0	1	0	0	0	0	0	7.01506	1.30044	2.73088	0.582725	11.3826
0	1	0	0	0	0	0	7.41541	1.35896	3.29746	0.755982	11.8486
0	1	0	0	0	0	0	8.48563	1.37413	3.48197	0.859779	11.9646
0	1	0	0	0	0	0	9.04921	1.38037	4.32835	1.07555	12.059
0	1	0	0	0	0	0	8.91805	1.39529	4.29319	0.984756	12.4382
0	1	0	0	0	0	0	9.48984	1.39872	4.63904	1.05477	12.9104
0	1	0	0	0	0	0	9.36549	1.40275	4.50398	0.91882	13.3187
0	1	0	0	0	0	0	9.55638	1.42714	4.86705	0.751264	13.5174
0	1	0	0	0	0	0	10.3891	1.40252	5.33306	0.757071	14.0528
0	1	0	0	0	0	0	9.41534	1.38809	4.71164	0.645862	14.3187
0	1	0	0	0	0	0	10.1019	1.37397	3.75522	0.787976	14.7444
0	1	0	0	0	0	0	11.0026	1.34016	3.21763	1.12385	15.1472
0	1	0	0	0	0	0	11.2001	1.37689	3.18247	1.38753	15.6208
0	1	0	0	0	0	0	10.9749	1.33794	2.57768	1.16913	15.8944
0	1	0	0	0	0	0	11.0933	1.34819	2.45129	0.946039	16.0014
0	1	0	0	0	0	0	10.0302	1.33153	2.4368	0.863315	16.7222
0	1	0	0	0	0	0	10.5593	1.33613	2.57475	0.830268	16.9611
0	1	0	0	0	0	0	10.2623	1.31079	2.14405	0.731328	17.0097
0	1	0	0	0	0	0	10.8943	1.38435	2.51296	1.02048	17.034
0	1	0	0	0	0	0	9.95702	1.32623	2.2557	0.895707	17.0542
0	1	0	0	0	0	0	10.5223	1.36336	2.55135	0.830502	17.2333
0	1	0	0	0	0	0	8.5762	1.35758	2.34532	0.64183	17.4292
0	1	0	0	0	0	0	8.08682	1.28429	2.12596	0.63308	17.3285
0	1	0	0	0	0	0	6.90777	1.26807	1.95906	0.430811	17.1076
0	1	0	0	0	0	0	6.17939	1.20135	1.89722	0.484969	16.909
0	1	0	0	0	0	0	5.07986	1.2444	2.25764	0.43755	16.6486
0	1	0	0	0	0	0	6.244	1.23175	1.90349	0.395222	16.3639
0	1	0	0	0	0	0	6.17394	1.13714	1.53061	0.278273	16.1306
0	1	0	0	0	0	0	7.59734	1.18528	1.6359	0.484848	16.1222
0	1	0	0	0	0	0	8.12631	1.22935	2.8236	0.571091	16.6462
0	1	0	0	0	0	0	7.60819	1.26885	2.03786	0.652138	16.6757
0	1	0	0	0	0	0	7.07506	1.24526	1.89739	0.603	16.4208
0	1	0	0	0	0	0	6.43471	1.23187	2.0715	0.608097	16.2035
0	0	1	0	0	0	0	3.77723	1.14684	10.8255	0.50178	7.69167
0	0	1	0	0	0	0	4.75326	1.15265	20.3037	0.436539	8.04583
0	0	1	0	0	0	0	5.95901	1.19593	25.1624	0.359095	8.78264
0	0	1	0	0	0	0	5.91314	1.20665	27.714	0.498082	8.96458
0	0	1	0	0	0	0	6.37141	1.20324	27.3362	0.357117	9.18611
0	0	1	0	0	0	0	6.55942	1.20309	27.9414	0.498174	9.92292
0	0	1	0	0	0	0	6.6464	1.23498	30.5961	0.518567	10.2458
0	0	1	0	0	0	0	7.60386	1.2578	35.1468	0.720978	10.2826
0	0	1	0	0	0	0	7.72386	1.24198	33.4341	0.793055	10.3063
0	0	1	0	0	0	0	7.64213	1.28871	35.1016	0.782543	10.434
0	0	1	0	0	0	0	7.48327	1.29438	33.1374	0.863228	10.4415
0	0	1	0	0	0	0	7.42687	1.29903	25.0078	0.87318	10.2417
0	0	1	0	0	0	0	7.55119	1.36588	20.355	0.867039	10.4611
0	0	1	0	0	0	0	7.80923	1.34536	21.36	0.808397	10.6368
0	0	1	0	0	0	0	7.09849	1.3538	14.6159	0.740093	10.7222
0	0	1	0	0	0	0	7.20434	1.36537	9.09961	0.841462	10.5889
0	0	1	0	0	0	0	7.89663	1.38864	7.13959	0.936363	10.634
0	0	1	0	0	0	0	7.72677	1.39267	5.05262	0.791181	10.7694
0	0	1	0	0	0	0	7.4101	1.45195	3.89624	0.788696	10.5799
0	0	1	0	0	0	0	8.51592	1.49086	2.33362	1.09926	10.3569
0	0	1	0	0	0	0	9.07594	1.44836	2.39066	1.30192	10.4875
0	0	1	0	0	0	0	8.99889	1.47126	2.50321	1.18642	10.7361
0	0	1	0	0	0	0	8.44202	1.44769	2.49671	1.10221	10.9875
0	0	1	0	0	0	0	8.40036	1.46583	2.51205	0.96123	11.0881
0	0	1	0	0	0	0	8.29239	1.43671	2.46106	0.893025	11.3826
0	0	1	0	0	0	0	7.93835	1.46348	2.74046	0.930933	11.8486
0	0	1	0	0	0	0	8.50626	1.40093	2.94868	0.922926	11.9646
0	0	1	0	0	0	0	8.52058	1.44273	3.14293	0.95746	12.059
0	0	1	0	0	0	0	7.81562	1.42958	3.33422	0.761067	12.4382
0	0	1	0	0	0	0	7.20071	1.40828	3.21417	0.633302	13.3187
0	0	1	0	0	0	0	7.50246	1.56032	3.58277	0.826754	13.5174
0	0	1	0	0	0	0	8.7962	1.4137	3.18922	0.621963	13.7299
0	0	1	0	0	0	0	8.94119	1.53782	3.90311	0.954613	14.3187
0	0	1	0	0	0	0	9.05725	1.525	3.73699	0.996089	14.7444
0	0	1	0	0	0	0	10.3119	1.37558	3.28755	0.830584	15.1472
0	0	1	0	0	0	0	10.3916	1.39999	3.28523	0.844957	15.8944
0	0	1	0	0	0	0	10.4527	1.54879	4.1463	1.06492	16.0014
0	0	1	0	0	0	0	8.6306	1.38789	3.52692	0.864404	16.3208
0	0	1	0	0	0	0	10.281	1.43026	3.53998	1.2183	16.9611
0	0	1	0	0	0	0	11.0781	1.35746	3.24024	1.15693	17.0097
0	0	1	0	0	0	0	11.1531	1.38487	3.44471	1.31374	17.034
0	0	1	0	0	0	0	11.0348	1.34085	2.81032	1.29488	17.2333
0	0	1	0	0	0	0	11.6864	1.29107	1.99708	1.40799	17.4292
0	0	1	0	0	0	0	12.6628	1.31834	1.88361	1.68042	17.5132
0	0	1	0	0	0	0	12.5871	1.35003	1.93957	1.52	17.3285
0	0	1	0	0	0	0	12.1052	1.39553	1.98423	1.33477	16.909
0	0	1	0	0	0	0	10.9245	1.41851	2.19915	1.2068	16.6486
0	0	1	0	0	0	0	10.3177	1.48484	2.30832	0.967669	16.3639
0	0	1	0	0	0	0	9.14344	1.50723	2.61257	0.706383	16.1222
0	0	1	0	0	0	0	9.19084	1.47218	2.42857	0.480287	16.3438
0	0	1	0	0	0	0	4.92956	1.32007	1.98856	0.413746	16.6462
0	0	1	0	0	0	0	3.90118	1.30164	1.90373	0.410054	16.4208
0	0	1	0	0	0	0	4.95648	1.34559	2.26228	0.586454	16.2035
0	0	0	1	0	0	0	3.13838	1.09736	7.75538	0.524205	8.04583
0	0	0	1	0	0	0	3.4184	1.14142	14.7104	0.38964	8.47639
0	0	0	1	0	0	0	3.96775	1.19018	22.7386	0.376693	8.96458
0	0	0	1	0	0	0	5.17869	1.28717	30.3963	0.442066	9.18611
0	0	0	1	0	0	0	6.07068	1.31527	34.6737	0.60665	9.92292
0	0	0	1	0	0	0	6.80572	1.34268	40.7159	0.722689	10.2458
0	0	0	1	0	0	0	7.09912	1.37367	47.8749	0.814225	10.2764
0	0	0	1	0	0	0	7.29338	1.41036	48.3633	0.973105	10.434
0	0	0	1	0	0	0	6.91775	1.44209	49.2282	0.872023	10.4415
0	0	0	1	0	0	0	6.45281	1.44356	49.2494	1.00952	10.3699
0	0	0	1	0	0	0	6.72633	1.48898	27.6402	0.991925	10.4611
0	0	0	1	0	0	0	7.1322	1.4269	11.3893	1.18406	10.7222
0	0	0	1	0	0	0	6.40984	1.448	4.4889	1.14306	10.691
0	0	0	1	0	0	0	5.73821	1.34743	2.86651	0.904451	10.634
0	0	0	1	0	0	0	4.9989	1.15906	2.18198	0.514391	10.7694
0	0	0	1	0	0	0	5.66357	1.12768	2.24144	0.540259	10.5799
0	0	0	1	0	0	0	5.82267	1.22326	2.81484	0.584618	10.4819
0	0	0	1	0	0	0	7.13379	1.29782	3.23706	0.642397	10.3257
0	0	0	1	0	0	0	8.08658	1.41062	3.75365	0.764895	10.4875
0	0	0	1	0	0	0	9.62209	1.4429	4.36167	0.894892	10.7361
0	0	0	1	0	0	0	10.5335	1.51201	4.95442	1.01306	10.9875
0	0	0	1	0	0	0	9.80522	1.48588	4.68693	0.815989	11.0881
0	0	0	1	0	0	0	10.7345	1.51509	4.55804	1.00266	11.6326
0	0	0	1	0	0	0	11.1439	1.49391	4.30428	0.842792	11.9646
0	0	0	1	0	0	0	10.9555	1.50149	3.98589	0.640563	12.059
0	0	0	1	0	0	0	10.617	1.49484	3.78954	0.704653	12.9104
0	0	0	1	0	0	0	12.1698	1.49661	3.36903	0.813618	13.3187
0	0	0	1	0	0	0	11.9985	1.46963	2.86395	0.805949	13.7299
0	0	0	1	0	0	0	11.6618	1.4569	2.59112	0.721527	14.0528
0	0	0	1	0	0	0	12.5965	1.47221	2.75129	0.770491	14.7444
0	0	0	1	0	0	0	12.3391	1.46709	2.57475	0.655787	15.6208
0	0	0	1	0	0	0	12.1293	1.47682	2.5656	0.557885	15.8944
0	0	0	1	0	0	0	11.3316	1.43835	2.37864	0.586979	16.3208
0	0	0	1	0	0	0	10.2075	1.42223	2.24402	0.618927	16.7222
0	0	0	1	0	0	0	10.1241	1.4008	2.26778	0.739478	17.0097
0	0	0	1	0	0	0	9.60137	1.39418	2.20248	0.669122	17.034
0	0	0	1	0	0	0	9.31857	1.36143	2.17637	1.02527	17.2333
0	0	0	1	0	0	0	9.08799	1.318	1.98123	0.689744	17.4292
0	0	0	1	0	0	0	8.51971	1.2817	2.03915	0.52309	17.3285
0	0	0	1	0	0	0	7.30665	1.23753	1.83058	0.685325	16.909
0	0	0	1	0	0	0	6.65019	1.22799	1.87808	0.565704	16.6486
0	0	0	1	0	0	0	6.20795	1.17428	1.72258	0.36076	16.1306
0	0	0	1	0	0	0	5.65208	1.21591	1.80619	0.407756	16.1222
0	0	0	1	0	0	0	4.64773	1.1037	1.6412	0.354778	16.6462
0	0	0	1	0	0	0	5.29239	1.0951	1.70221	0.369058	16.6757
0	0	0	1	0	0	0	5.27108	1.07917	1.97544	0.339189	16.2035
0	0	0	0	1	0	0	4.13314	1.11632	3.72961	0.214771	8.04583
0	0	0	0	1	0	0	3.99583	1.02423	10.3294	0.303648	8.47639
0	0	0	0	1	0	0	5.01958	1.11029	27.0625	0.366094	8.96458
0	0	0	0	1	0	0	5.11141	1.14105	30.6015	0.295775	9.18611
0	0	0	0	1	0	0	5.29771	1.17981	34.4969	0.327519	9.92292
0	0	0	0	1	0	0	5.40015	1.20632	43.2549	0.389867	10.2458
0	0	0	0	1	0	0	5.7574	1.1961	45.1943	0.402853	10.2764
0	0	0	0	1	0	0	6.06959	1.23279	55.0442	0.493878	10.434
0	0	0	0	1	0	0	6.06504	1.25252	57.1118	0.504041	10.4415
0	0	0	0	1	0	0	6.05891	1.25317	58.6531	0.607567	10.3699
0	0	0	0	1	0	0	5.71845	1.22757	52.2341	0.602183	10.4611
0	0	0	0	1	0	0	5.89198	1.23838	46.1517	0.580014	10.7222
0	0	0	0	1	0	0	5.83538	1.2036	31.0487	0.607234	10.691
0	0	0	0	1	0	0	6.0246	1.24534	22.9111	0.609593	10.634
0	0	0	0	1	0	0	5.88053	1.23272	11.8389	0.638316	10.7694
0	0	0	0	1	0	0	5.82878	1.26654	8.08795	0.593794	10.5799
0	0	0	0	1	0	0	5.73227	1.28576	5.00059	0.601794	10.4819
0	0	0	0	1	0	0	5.6601	1.25603	3.32086	0.496124	10.3257
0	0	0	0	1	0	0	6.00259	1.25848	2.2629	0.688809	10.4875
0	0	0	0	1	0	0	5.93828	1.29004	2.07012	0.893573	10.7361
0	0	0	0	1	0	0	5.9007	1.29342	1.93305	0.584133	10.9875
0	0	0	0	1	0	0	6.29869	1.28777	1.80044	0.666495	11.0881
0	0	0	0	1	0	0	6.6598	1.29563	1.96161	0.743906	11.6326
0	0	0	0	1	0	0	6.40148	1.2795	1.84865	0.628668	11.9646
0	0	0	0	1	0	0	5.89365	1.26039	1.89893	0.522528	12.059
0	0	0	0	1	0	0	5.41654	1.26532	2.02767	0.508855	12.9104
0	0	0	0	1	0	0	6.43199	1.30655	2.53378	0.686306	13.3187
0	0	0	0	1	0	0	7.02014	1.30636	2.74146	0.604436	13.7299
0	0	0	0	1	0	0	7.43195	1.33666	2.96667	0.692368	14.0528
0	0	0	0	1	0	0	7.97487	1.446	3.6917	0.879497	14.7444
0	0	0	0	1	0	0	8.99831	1.30724	3.71087	1.14501	15.6208
0	0	0	0	1	0	0	8.58598	1.25271	2.96793	0.982919	15.8944
0	0	0	0	1	0	0	8.76136	1.33459	3.06177	0.964125	16.3208
0	0	0	0	1	0	0	8.49105	1.36394	3.47873	1.11067	16.7222
0	0	0	0	1	0	0	8.31784	1.3315	3.29621	1.06861	17.0097
0	0	0	0	1	0	0	8.63625	1.28119	2.38641	0.932563	17.034
0	0	0	0	1	0	0	8.19637	1.29631	2.3827	1.02194	17.2333
0	0	0	0	1	0	0	8.76317	1.29458	2.12742	1.0104	17.4292
0	0	0	0	1	0	0	7.97044	1.29388	2.01009	0.990066	17.3285
0	0	0	0	1	0	0	8.0642	1.27015	1.81608	1.03294	16.909
0	0	0	0	1	0	0	7.38588	1.23914	1.73146	0.707825	16.6486
0	0	0	0	1	0	0	6.56532	1.18906	1.56514	0.623672	16.1306
0	0	0	0	1	0	0	5.38237	1.12589	1.4473	0.564314	16.1222
0	0	0	0	1	0	0	4.3945	1.03833	1.14608	0.494259	16.6462
0	0	0	0	1	0	0	4.51549	1.00315	1.06727	0.381777	16.6757
0	0	0	0	1	0	0	3.31217	1.02927	1.31689	0.268462	16.2035
0	0	0	0	1	0	0	4.09063	1.11105	1.42375	0.404172	16.2688
0	0	0	0	0	1	0	3.69473	1.02919	6.98872	0.764351	7.69167
0	0	0	0	0	1	0	5.02305	1.15927	26.4585	0.882221	8.47639
0	0	0	0	0	1	0	6.21805	1.28091	35.5826	1.21934	8.96458
0	0	0	0	0	1	0	6.43076	1.31341	35.461	1.326	9.51528
0	0	0	0	0	1	0	7.50122	1.32768	27.1436	1.65394	10.2458
0	0	0	0	0	1	0	7.17097	1.28839	34.3672	1.52261	10.3063
0	0	0	0	0	1	0	6.73143	1.34227	38.0238	1.63223	10.434
0	0	0	0	0	1	0	6.88062	1.31946	42.2863	1.73255	10.2417
0	0	0	0	0	1	0	6.78916	1.30821	40.8222	1.71304	10.6368
0	0	0	0	0	1	0	7.07202	1.2867	27.1446	1.7164	10.7222
0	0	0	0	0	1	0	7.50437	1.3124	19.1345	1.41404	10.5889
0	0	0	0	0	1	0	7.4717	1.36484	11.9452	1.50025	10.7694
0	0	0	0	0	1	0	7.1556	1.35987	8.25576	1.51594	10.6069
0	0	0	0	0	1	0	6.89979	1.3726	5.69125	1.75633	10.4819
0	0	0	0	0	1	0	6.7203	1.35826	4.78791	1.81074	10.3569
0	0	0	0	0	1	0	7.49568	1.44912	4.61606	1.84517	10.9743
0	0	0	0	0	1	0	7.02039	1.38495	4.35586	1.54898	10.9875
0	0	0	0	0	1	0	6.58471	1.35746	3.76382	1.48452	11.3826
0	0	0	0	0	1	0	6.11053	1.34139	2.9111	1.35309	11.9646
0	0	0	0	0	1	0	5.35304	1.19523	2.30022	1.20931	12.4382
0	0	0	0	0	1	0	5.26412	1.26167	2.90214	1.39976	12.9104
0	0	0	0	0	1	0	5.88134	1.26141	3.2063	1.4357	13.7299
0	0	0	0	0	1	0	6.90385	1.24969	3.54944	1.58889	14.3187
0	0	0	0	0	1	0	7.57465	1.28901	4.15732	1.59011	14.7444
0	0	0	0	0	1	0	7.80219	1.27616	4.33354	1.63374	15.8944
0	0	0	0	0	1	0	7.67282	1.29418	5.38571	1.49948	16.3208
0	0	0	0	0	1	0	9.24876	1.35684	7.46869	1.89523	16.9611
0	0	0	0	0	1	0	8.04737	1.33337	6.39722	1.29125	17.0097
0	0	0	0	0	1	0	7.10304	1.30052	5.47783	0.824672	17.2333
0	0	0	0	0	1	0	8.43574	1.29399	7.35692	1.00778	17.5132
0	0	0	0	0	1	0	9.00908	1.33815	8.08976	0.97059	17.3285
0	0	0	0	0	1	0	8.43831	1.29934	7.95788	0.720771	16.6486
0	0	0	0	0	1	0	7.21088	1.2398	7.71736	0.646125	16.1306
0	0	0	0	0	1	0	6.53859	1.23604	5.10532	0.543182	16.3438
0	0	0	0	0	1	0	6.33376	1.22385	3.33474	0.686431	16.6757
0	0	0	0	0	1	0	6.17311	1.25128	2.7551	1.077	16.2035
0	0	0	0	0	0	1	3.96316	1.26612	4.83045	0.332471	8.04583
0	0	0	0	0	0	1	4.56643	1.24861	14.14	0.47539	8.78264
0	0	0	0	0	0	1	5.25134	1.31666	26.07	0.580255	9.18611
0	0	0	0	0	0	1	6.8152	1.30442	44.0976	0.573926	9.92292
0	0	0	0	0	0	1	6.43866	1.35415	52.228	0.523318	10.2458
0	0	0	0	0	0	1	6.08439	1.32442	50.4855	0.511773	10.2764
0	0	0	0	0	0	1	5.86774	1.32193	58.9697	0.517248	10.434
0	0	0	0	0	0	1	6.0592	1.31406	69.7409	0.494653	10.2417
0	0	0	0	0	0	1	6.46784	1.33184	67.7113	0.685617	10.4611
0	0	0	0	0	0	1	6.36449	1.365	73.0028	0.598533	10.7222
0	0	0	0	0	0	1	6.3131	1.36609	59.7892	0.684155	10.5889
0	0	0	0	0	0	1	6.29563	1.41589	51.2372	0.716497	10.7694
0	0	0	0	0	0	1	6.77828	1.47033	31.9426	0.691878	10.5799
0	0	0	0	0	0	1	6.89748	1.39812	15.1003	0.585756	10.4819
0	0	0	0	0	0	1	7.21518	1.38966	5.86015	0.558297	10.3257
0	0	0	0	0	0	1	6.62358	1.38538	3.03769	0.604654	10.4875
0	0	0	0	0	0	1	6.28338	1.38417	2.65352	0.505199	10.9743
0	0	0	0	0	0	1	6.71736	1.42842	2.55747	0.484236	11.0881
0	0	0	0	0	0	1	7.32169	1.45656	2.58388	0.622846	11.6326
0	0	0	0	0	0	1	7.32722	1.41838	2.51444	0.582839	11.9646
0	0	0	0	0	0	1	8.11284	1.43538	2.62578	0.705907	12.4382
0	0	0	0	0	0	1	8.01199	1.44687	2.89696	0.627753	13.3187
0	0	0	0	0	0	1	7.12446	1.45353	3.53497	0.729905	13.7299
0	0	0	0	0	0	1	7.62125	1.52048	3.46919	0.906528	14.0528
0	0	0	0	0	0	1	8.72443	1.43624	3.13957	0.879069	14.7444
0	0	0	0	0	0	1	8.28354	1.42708	3.14838	0.710532	15.6208
0	0	0	0	0	0	1	9.84082	1.45485	3.45407	0.941529	16.0014
0	0	0	0	0	0	1	9.75348	1.46679	3.16936	0.794661	16.7222
0	0	0	0	0	0	1	9.67491	1.63862	3.7616	0.923645	17.0097
0	0	0	0	0	0	1	8.11615	1.35853	2.9932	0.709943	17.0542
0	0	0	0	0	0	1	6.54525	1.12126	2.03857	0.419841	17.4292
0	0	0	0	0	0	1	7.74781	1.14023	2.17887	0.576601	17.3285
0	0	0	0	0	0	1	6.55692	1.15208	1.77806	0.363785	16.909
0	0	0	0	0	0	1	8.42887	1.23541	1.96629	0.539089	16.6486
0	0	0	0	0	0	1	8.26109	1.30762	2.14586	0.680196	16.1306
0	0	0	0	0	0	1	6.91811	1.34693	2.38409	0.796015	16.3438
0	0	0	0	0	0	1	7.23949	1.42014	2.78523	0.644019	16.6757
0	0	0	0	0	0	1	7.32276	1.35134	2.37125	0.560972	16.2035
0	0	0	0	0	0	1	7.80295	1.24996	2.43987	0.72575	16.1687

## Sheet: test oss
1	0	0	0	0	0	0	3.2529	1.10134	14.9058	0.316187	7.69167
1	0	0	0	0	0	0	3.24066	1.16114	21.5625	0.313487	8.04583
1	0	0	0	0	0	0	3.81352	1.21188	27.982	0.336061	8.47639
1	0	0	0	0	0	0	3.77318	1.25731	32.0862	0.273825	8.96458
1	0	0	0	0	0	0	5.42762	1.23039	28.7804	0.41615	9.18611
1	0	0	0	0	0	0	5.30156	1.22362	28.6061	0.315791	9.51528
1	0	0	0	0	0	0	6.19122	1.23611	30.5757	0.363587	9.92292
1	0	0	0	0	0	0	5.28004	1.25395	33.5587	0.412039	10.2458
1	0	0	0	0	0	0	5.07321	1.27723	34.694	0.385728	10.2826
1	0	0	0	0	0	0	5.80388	1.28297	36.0678	0.497171	10.3063
1	0	0	0	0	0	0	6.16055	1.3052	35.7989	0.622934	10.434
1	0	0	0	0	0	0	6.04414	1.31142	34.4428	1.51103	10.4415
1	0	0	0	0	0	0	6.09473	1.3035	29.0469	0.652449	10.2417
1	0	0	0	0	0	0	5.67145	1.2724	30.025	0.51492	10.3699
1	0	0	0	0	0	0	5.90151	1.27799	24.2604	0.450719	10.6368
1	0	0	0	0	0	0	6.1741	1.27593	15.6078	0.491138	10.7222
1	0	0	0	0	0	0	6.58548	1.26154	7.94517	0.60448	10.691
1	0	0	0	0	0	0	6.48993	1.30851	5.8303	0.568414	10.5889
1	0	0	0	0	0	0	6.52306	1.30881	4.01565	0.528945	10.634
1	0	0	0	0	0	0	6.40037	1.32639	2.89725	0.516325	10.7694
1	0	0	0	0	0	0	6.38325	1.33575	2.32657	0.631698	10.5799
1	0	0	0	0	0	0	7.01142	1.33092	2.236	0.718104	10.6069
1	0	0	0	0	0	0	6.23172	1.30507	2.14669	0.527145	10.4819
1	0	0	0	0	0	0	6.93752	1.33487	2.06092	0.640313	10.3257
1	0	0	0	0	0	0	6.95735	1.33135	1.99631	0.635634	10.3569
1	0	0	0	0	0	0	6.49191	1.31631	1.97559	0.552135	10.7361
1	0	0	0	0	0	0	6.64288	1.30409	2.01893	0.69925	10.9743
1	0	0	0	0	0	0	6.46787	1.25656	1.86006	0.46772	10.9875
1	0	0	0	0	0	0	6.78994	1.2999	2.11104	0.521697	11.0881
1	0	0	0	0	0	0	6.63297	1.27582	2.09556	0.475708	11.3826
1	0	0	0	0	0	0	6.94517	1.30156	2.30785	0.520571	11.8486
1	0	0	0	0	0	0	7.99124	1.35407	2.70789	0.654468	11.9646
1	0	0	0	0	0	0	8.1149	1.35525	2.98106	0.63873	12.059
1	0	0	0	0	0	0	7.74642	1.32608	2.89318	0.522116	12.4382
1	0	0	0	0	0	0	7.58422	1.34521	2.85198	0.62077	12.9104
1	0	0	0	0	0	0	7.48288	1.36058	3.01354	0.569515	13.3187
1	0	0	0	0	0	0	7.56591	1.33281	3.17422	0.495815	13.7299
1	0	0	0	0	0	0	8.87425	1.34492	3.04888	0.816949	14.0528
1	0	0	0	0	0	0	8.54483	1.36421	2.91419	0.70679	14.3187
1	0	0	0	0	0	0	9.99448	1.38714	3.33717	0.823696	14.7444
1	0	0	0	0	0	0	10.3006	1.39866	3.1484	0.804297	15.1472
1	0	0	0	0	0	0	9.709	1.39784	3.08953	0.848161	15.8944
1	0	0	0	0	0	0	9.90453	1.35286	2.97028	0.812776	16.0014
1	0	0	0	0	0	0	10.6812	1.35965	3.04046	1.02803	16.3208
1	0	0	0	0	0	0	10.2006	1.35031	2.92561	0.916996	16.7222
1	0	0	0	0	0	0	9.5657	1.34442	2.89885	0.840237	16.9611
1	0	0	0	0	0	0	10.1513	1.34002	2.36854	0.913394	17.0097
1	0	0	0	0	0	0	11.0995	1.3326	2.24456	0.924481	17.0542
1	0	0	0	0	0	0	11.6003	1.32763	2.11723	0.983763	17.2333
1	0	0	0	0	0	0	10.5566	1.35882	2.10193	0.800736	17.4292
1	0	0	0	0	0	0	9.89461	1.32223	2.19657	0.8036	17.5132
1	0	0	0	0	0	0	8.88838	1.3022	2.35774	0.629646	17.3285
1	0	0	0	0	0	0	7.47911	1.2663	1.82592	0.608467	16.909
1	0	0	0	0	0	0	6.54912	1.20259	2.19195	0.458236	16.6486
1	0	0	0	0	0	0	6.20275	1.18958	1.75802	0.594707	16.3639
1	0	0	0	0	0	0	5.57069	1.13697	1.50337	0.311358	16.1306
1	0	0	0	0	0	0	4.89113	1.08894	1.52209	0.274824	16.1222
1	0	0	0	0	0	0	4.69252	1.0831	1.39993	0.274261	16.3438
1	0	0	0	0	0	0	4.72792	1.06196	1.42443	0.326472	16.6757
1	0	0	0	0	0	0	5.74667	1.10147	1.5506	0.396622	16.4208
1	0	0	0	0	0	0	5.68799	1.11847	1.60436	0.408964	16.2035
0	1	0	0	0	0	0	3.7561	1.11376	31.3027	0.213735	7.69167
0	1	0	0	0	0	0	6.17638	1.15517	54.803	0.478704	8.04583
0	1	0	0	0	0	0	6.24634	1.17572	55.0361	0.49785	8.47639
0	1	0	0	0	0	0	6.71592	1.21146	54.5788	0.62952	8.78264
0	1	0	0	0	0	0	6.79896	1.20615	58.7527	0.668247	9.18611
0	1	0	0	0	0	0	6.80576	1.19161	35.2994	0.74629	9.51528
0	1	0	0	0	0	0	6.97167	1.22177	30.3017	0.772644	9.92292
0	1	0	0	0	0	0	6.41567	1.22403	40.8111	0.743144	10.2458
0	1	0	0	0	0	0	6.43033	1.2706	49.3199	0.719827	10.2826
0	1	0	0	0	0	0	6.39936	1.31763	55.2324	0.685884	10.2764
0	1	0	0	0	0	0	6.9129	1.23895	12.2241	0.747291	10.3063
0	1	0	0	0	0	0	7.22849	1.22997	7.54507	0.81902	10.4415
0	1	0	0	0	0	0	7.15734	1.27296	4.33977	0.754142	10.2417
0	1	0	0	0	0	0	7.25234	1.25602	4.00291	0.717948	10.3699
0	1	0	0	0	0	0	7.18695	1.26807	3.93021	0.648861	10.4611
0	1	0	0	0	0	0	6.94725	1.31861	4.62419	0.583115	10.6368
0	1	0	0	0	0	0	7.20629	1.33322	4.12457	0.668687	10.7222
0	1	0	0	0	0	0	6.73623	1.24657	2.31671	0.581847	10.691
0	1	0	0	0	0	0	6.94898	1.2754	2.12989	0.666469	10.634
0	1	0	0	0	0	0	6.65673	1.24795	1.98503	0.51653	10.7694
0	1	0	0	0	0	0	6.42724	1.2665	1.96346	0.40804	10.6174
0	1	0	0	0	0	0	6.36652	1.33758	2.02532	0.428001	10.5799
0	1	0	0	0	0	0	5.98888	1.22198	1.76999	0.441568	10.6069
0	1	0	0	0	0	0	5.97591	1.23777	2.07213	0.40602	10.4819
0	1	0	0	0	0	0	5.95949	1.23686	1.82612	0.387334	10.3257
0	1	0	0	0	0	0	5.78621	1.25835	1.98928	0.442945	10.4875
0	1	0	0	0	0	0	6.13578	1.27623	2.05658	0.390528	10.7361
0	1	0	0	0	0	0	6.43001	1.28116	2.25788	0.471606	10.9743
0	1	0	0	0	0	0	6.28756	1.26033	2.32206	0.412453	10.9875
0	1	0	0	0	0	0	6.9514	1.29196	2.5505	0.588892	11.0881
0	1	0	0	0	0	0	7.01506	1.30044	2.73088	0.582725	11.3826
0	1	0	0	0	0	0	7.41541	1.35896	3.29746	0.755982	11.8486
0	1	0	0	0	0	0	8.48563	1.37413	3.48197	0.859779	11.9646
0	1	0	0	0	0	0	9.04921	1.38037	4.32835	1.07555	12.059
0	1	0	0	0	0	0	8.91805	1.39529	4.29319	0.984756	12.4382
0	1	0	0	0	0	0	9.48984	1.39872	4.63904	1.05477	12.9104
0	1	0	0	0	0	0	9.36549	1.40275	4.50398	0.91882	13.3187
0	1	0	0	0	0	0	9.55638	1.42714	4.86705	0.751264	13.5174
0	1	0	0	0	0	0	10.3891	1.40252	5.33306	0.757071	14.0528
0	1	0	0	0	0	0	9.41534	1.38809	4.71164	0.645862	14.3187
0	1	0	0	0	0	0	10.1019	1.37397	3.75522	0.787976	14.7444
0	1	0	0	0	0	0	11.0026	1.34016	3.21763	1.12385	15.1472
0	1	0	0	0	0	0	11.2001	1.37689	3.18247	1.38753	15.6208
0	1	0	0	0	0	0	10.9749	1.33794	2.57768	1.16913	15.8944
0	1	0	0	0	0	0	11.0933	1.34819	2.45129	0.946039	16.0014
0	1	0	0	0	0	0	10.0302	1.33153	2.4368	0.863315	16.7222
0	1	0	0	0	0	0	10.5593	1.33613	2.57475	0.830268	16.9611
0	1	0	0	0	0	0	10.2623	1.31079	2.14405	0.731328	17.0097
0	1	0	0	0	0	0	10.8943	1.38435	2.51296	1.02048	17.034
0	1	0	0	0	0	0	9.95702	1.32623	2.2557	0.895707	17.0542
0	1	0	0	0	0	0	10.5223	1.36336	2.55135	0.830502	17.2333
0	1	0	0	0	0	0	8.5762	1.35758	2.34532	0.64183	17.4292
0	1	0	0	0	0	0	8.08682	1.28429	2.12596	0.63308	17.3285
0	1	0	0	0	0	0	6.90777	1.26807	1.95906	0.430811	17.1076
0	1	0	0	0	0	0	6.17939	1.20135	1.89722	0.484969	16.909
0	1	0	0	0	0	0	5.07986	1.2444	2.25764	0.43755	16.6486
0	1	0	0	0	0	0	6.244	1.23175	1.90349	0.395222	16.3639
0	1	0	0	0	0	0	6.17394	1.13714	1.53061	0.278273	16.1306
0	1	0	0	0	0	0	7.59734	1.18528	1.6359	0.484848	16.1222
0	1	0	0	0	0	0	8.12631	1.22935	2.8236	0.571091	16.6462
0	1	0	0	0	0	0	7.60819	1.26885	2.03786	0.652138	16.6757
0	1	0	0	0	0	0	7.07506	1.24526	1.89739	0.603	16.4208
0	1	0	0	0	0	0	6.43471	1.23187	2.0715	0.608097	16.2035
0	0	1	0	0	0	0	3.77723	1.14684	10.8255	0.50178	7.69167
0	0	1	0	0	0	0	4.75326	1.15265	20.3037	0.436539	8.04583
0	0	1	0	0	0	0	5.95901	1.19593	25.1624	0.359095	8.78264
0	0	1	0	0	0	0	5.91314	1.20665	27.714	0.498082	8.96458
0	0	1	0	0	0	0	6.37141	1.20324	27.3362	0.357117	9.18611
0	0	1	0	0	0	0	6.55942	1.20309	27.9414	0.498174	9.92292
0	0	1	0	0	0	0	6.6464	1.23498	30.5961	0.518567	10.2458
0	0	1	0	0	0	0	7.60386	1.2578	35.1468	0.720978	10.2826
0	0	1	0	0	0	0	7.72386	1.24198	33.4341	0.793055	10.3063
0	0	1	0	0	0	0	7.64213	1.28871	35.1016	0.782543	10.434
0	0	1	0	0	0	0	7.48327	1.29438	33.1374	0.863228	10.4415
0	0	1	0	0	0	0	7.42687	1.29903	25.0078	0.87318	10.2417
0	0	1	0	0	0	0	7.55119	1.36588	20.355	0.867039	10.4611
0	0	1	0	0	0	0	7.80923	1.34536	21.36	0.808397	10.6368
0	0	1	0	0	0	0	7.09849	1.3538	14.6159	0.740093	10.7222
0	0	1	0	0	0	0	7.20434	1.36537	9.09961	0.841462	10.5889
0	0	1	0	0	0	0	7.89663	1.38864	7.13959	0.936363	10.634
0	0	1	0	0	0	0	7.72677	1.39267	5.05262	0.791181	10.7694
0	0	1	0	0	0	0	7.4101	1.45195	3.89624	0.788696	10.5799
0	0	1	0	0	0	0	8.51592	1.49086	2.33362	1.09926	10.3569
0	0	1	0	0	0	0	9.07594	1.44836	2.39066	1.30192	10.4875
0	0	1	0	0	0	0	8.99889	1.47126	2.50321	1.18642	10.7361
0	0	1	0	0	0	0	8.44202	1.44769	2.49671	1.10221	10.9875
0	0	1	0	0	0	0	8.40036	1.46583	2.51205	0.96123	11.0881
0	0	1	0	0	0	0	8.29239	1.43671	2.46106	0.893025	11.3826
0	0	1	0	0	0	0	7.93835	1.46348	2.74046	0.930933	11.8486
0	0	1	0	0	0	0	8.50626	1.40093	2.94868	0.922926	11.9646
0	0	1	0	0	0	0	8.52058	1.44273	3.14293	0.95746	12.059
0	0	1	0	0	0	0	7.81562	1.42958	3.33422	0.761067	12.4382
0	0	1	0	0	0	0	7.20071	1.40828	3.21417	0.633302	13.3187
0	0	1	0	0	0	0	7.50246	1.56032	3.58277	0.826754	13.5174
0	0	1	0	0	0	0	8.7962	1.4137	3.18922	0.621963	13.7299
0	0	1	0	0	0	0	8.94119	1.53782	3.90311	0.954613	14.3187
0	0	1	0	0	0	0	9.05725	1.525	3.73699	0.996089	14.7444
0	0	1	0	0	0	0	10.3119	1.37558	3.28755	0.830584	15.1472
0	0	1	0	0	0	0	10.3916	1.39999	3.28523	0.844957	15.8944
0	0	1	0	0	0	0	10.4527	1.54879	4.1463	1.06492	16.0014
0	0	1	0	0	0	0	8.6306	1.38789	3.52692	0.864404	16.3208
0	0	1	0	0	0	0	10.281	1.43026	3.53998	1.2183	16.9611
0	0	1	0	0	0	0	11.0781	1.35746	3.24024	1.15693	17.0097
0	0	1	0	0	0	0	11.1531	1.38487	3.44471	1.31374	17.034
0	0	1	0	0	0	0	11.0348	1.34085	2.81032	1.29488	17.2333
0	0	1	0	0	0	0	11.6864	1.29107	1.99708	1.40799	17.4292
0	0	1	0	0	0	0	12.6628	1.31834	1.88361	1.68042	17.5132
0	0	1	0	0	0	0	12.5871	1.35003	1.93957	1.52	17.3285
0	0	1	0	0	0	0	12.1052	1.39553	1.98423	1.33477	16.909
0	0	1	0	0	0	0	10.9245	1.41851	2.19915	1.2068	16.6486
0	0	1	0	0	0	0	10.3177	1.48484	2.30832	0.967669	16.3639
0	0	1	0	0	0	0	9.14344	1.50723	2.61257	0.706383	16.1222
0	0	1	0	0	0	0	9.19084	1.47218	2.42857	0.480287	16.3438
0	0	1	0	0	0	0	4.92956	1.32007	1.98856	0.413746	16.6462
0	0	1	0	0	0	0	3.90118	1.30164	1.90373	0.410054	16.4208
0	0	1	0	0	0	0	4.95648	1.34559	2.26228	0.586454	16.2035
0	0	0	1	0	0	0	3.13838	1.09736	7.75538	0.524205	8.04583
0	0	0	1	0	0	0	3.4184	1.14142	14.7104	0.38964	8.47639
0	0	0	1	0	0	0	3.96775	1.19018	22.7386	0.376693	8.96458
0	0	0	1	0	0	0	5.17869	1.28717	30.3963	0.442066	9.18611
0	0	0	1	0	0	0	6.07068	1.31527	34.6737	0.60665	9.92292
0	0	0	1	0	0	0	6.80572	1.34268	40.7159	0.722689	10.2458
0	0	0	1	0	0	0	7.09912	1.37367	47.8749	0.814225	10.2764
0	0	0	1	0	0	0	7.29338	1.41036	48.3633	0.973105	10.434
0	0	0	1	0	0	0	6.91775	1.44209	49.2282	0.872023	10.4415
0	0	0	1	0	0	0	6.45281	1.44356	49.2494	1.00952	10.3699
0	0	0	1	0	0	0	6.72633	1.48898	27.6402	0.991925	10.4611
0	0	0	1	0	0	0	7.1322	1.4269	11.3893	1.18406	10.7222
0	0	0	1	0	0	0	6.40984	1.448	4.4889	1.14306	10.691
0	0	0	1	0	0	0	5.73821	1.34743	2.86651	0.904451	10.634
0	0	0	1	0	0	0	4.9989	1.15906	2.18198	0.514391	10.7694
0	0	0	1	0	0	0	5.66357	1.12768	2.24144	0.540259	10.5799
0	0	0	1	0	0	0	5.82267	1.22326	2.81484	0.584618	10.4819
0	0	0	1	0	0	0	7.13379	1.29782	3.23706	0.642397	10.3257
0	0	0	1	0	0	0	8.08658	1.41062	3.75365	0.764895	10.4875
0	0	0	1	0	0	0	9.62209	1.4429	4.36167	0.894892	10.7361
0	0	0	1	0	0	0	10.5335	1.51201	4.95442	1.01306	10.9875
0	0	0	1	0	0	0	9.80522	1.48588	4.68693	0.815989	11.0881
0	0	0	1	0	0	0	10.7345	1.51509	4.55804	1.00266	11.6326
0	0	0	1	0	0	0	11.1439	1.49391	4.30428	0.842792	11.9646
0	0	0	1	0	0	0	10.9555	1.50149	3.98589	0.640563	12.059
0	0	0	1	0	0	0	10.617	1.49484	3.78954	0.704653	12.9104
0	0	0	1	0	0	0	12.1698	1.49661	3.36903	0.813618	13.3187
0	0	0	1	0	0	0	11.9985	1.46963	2.86395	0.805949	13.7299
0	0	0	1	0	0	0	11.6618	1.4569	2.59112	0.721527	14.0528
0	0	0	1	0	0	0	12.5965	1.47221	2.75129	0.770491	14.7444
0	0	0	1	0	0	0	12.3391	1.46709	2.57475	0.655787	15.6208
0	0	0	1	0	0	0	12.1293	1.47682	2.5656	0.557885	15.8944
0	0	0	1	0	0	0	11.3316	1.43835	2.37864	0.586979	16.3208
0	0	0	1	0	0	0	10.2075	1.42223	2.24402	0.618927	16.7222
0	0	0	1	0	0	0	10.1241	1.4008	2.26778	0.739478	17.0097
0	0	0	1	0	0	0	9.60137	1.39418	2.20248	0.669122	17.034
0	0	0	1	0	0	0	9.31857	1.36143	2.17637	1.02527	17.2333
0	0	0	1	0	0	0	9.08799	1.318	1.98123	0.689744	17.4292
0	0	0	1	0	0	0	8.51971	1.2817	2.03915	0.52309	17.3285
0	0	0	1	0	0	0	7.30665	1.23753	1.83058	0.685325	16.909
0	0	0	1	0	0	0	6.65019	1.22799	1.87808	0.565704	16.6486
0	0	0	1	0	0	0	6.20795	1.17428	1.72258	0.36076	16.1306
0	0	0	1	0	0	0	5.65208	1.21591	1.80619	0.407756	16.1222
0	0	0	1	0	0	0	4.64773	1.1037	1.6412	0.354778	16.6462
0	0	0	1	0	0	0	5.29239	1.0951	1.70221	0.369058	16.6757
0	0	0	1	0	0	0	5.27108	1.07917	1.97544	0.339189	16.2035
0	0	0	0	1	0	0	4.13314	1.11632	3.72961	0.214771	8.04583
0	0	0	0	1	0	0	3.99583	1.02423	10.3294	0.303648	8.47639
0	0	0	0	1	0	0	5.01958	1.11029	27.0625	0.366094	8.96458
0	0	0	0	1	0	0	5.11141	1.14105	30.6015	0.295775	9.18611
0	0	0	0	1	0	0	5.29771	1.17981	34.4969	0.327519	9.92292
0	0	0	0	1	0	0	5.40015	1.20632	43.2549	0.389867	10.2458
0	0	0	0	1	0	0	5.7574	1.1961	45.1943	0.402853	10.2764
0	0	0	0	1	0	0	6.06959	1.23279	55.0442	0.493878	10.434
0	0	0	0	1	0	0	6.06504	1.25252	57.1118	0.504041	10.4415
0	0	0	0	1	0	0	6.05891	1.25317	58.6531	0.607567	10.3699
0	0	0	0	1	0	0	5.71845	1.22757	52.2341	0.602183	10.4611
0	0	0	0	1	0	0	5.89198	1.23838	46.1517	0.580014	10.7222
0	0	0	0	1	0	0	5.83538	1.2036	31.0487	0.607234	10.691
0	0	0	0	1	0	0	6.0246	1.24534	22.9111	0.609593	10.634
0	0	0	0	1	0	0	5.88053	1.23272	11.8389	0.638316	10.7694
0	0	0	0	1	0	0	5.82878	1.26654	8.08795	0.593794	10.5799
0	0	0	0	1	0	0	5.73227	1.28576	5.00059	0.601794	10.4819
0	0	0	0	1	0	0	5.6601	1.25603	3.32086	0.496124	10.3257
0	0	0	0	1	0	0	6.00259	1.25848	2.2629	0.688809	10.4875
0	0	0	0	1	0	0	5.93828	1.29004	2.07012	0.893573	10.7361
0	0	0	0	1	0	0	5.9007	1.29342	1.93305	0.584133	10.9875
0	0	0	0	1	0	0	6.29869	1.28777	1.80044	0.666495	11.0881
0	0	0	0	1	0	0	6.6598	1.29563	1.96161	0.743906	11.6326
0	0	0	0	1	0	0	6.40148	1.2795	1.84865	0.628668	11.9646
0	0	0	0	1	0	0	5.89365	1.26039	1.89893	0.522528	12.059
0	0	0	0	1	0	0	5.41654	1.26532	2.02767	0.508855	12.9104
0	0	0	0	1	0	0	6.43199	1.30655	2.53378	0.686306	13.3187
0	0	0	0	1	0	0	7.02014	1.30636	2.74146	0.604436	13.7299
0	0	0	0	1	0	0	7.43195	1.33666	2.96667	0.692368	14.0528
0	0	0	0	1	0	0	7.97487	1.446	3.6917	0.879497	14.7444
0	0	0	0	1	0	0	8.99831	1.30724	3.71087	1.14501	15.6208
0	0	0	0	1	0	0	8.58598	1.25271	2.96793	0.982919	15.8944
0	0	0	0	1	0	0	8.76136	1.33459	3.06177	0.964125	16.3208
0	0	0	0	1	0	0	8.49105	1.36394	3.47873	1.11067	16.7222
0	0	0	0	1	0	0	8.31784	1.3315	3.29621	1.06861	17.0097
0	0	0	0	1	0	0	8.63625	1.28119	2.38641	0.932563	17.034
0	0	0	0	1	0	0	8.19637	1.29631	2.3827	1.02194	17.2333
0	0	0	0	1	0	0	8.76317	1.29458	2.12742	1.0104	17.4292
0	0	0	0	1	0	0	7.97044	1.29388	2.01009	0.990066	17.3285
0	0	0	0	1	0	0	8.0642	1.27015	1.81608	1.03294	16.909
0	0	0	0	1	0	0	7.38588	1.23914	1.73146	0.707825	16.6486
0	0	0	0	1	0	0	6.56532	1.18906	1.56514	0.623672	16.1306
0	0	0	0	1	0	0	5.38237	1.12589	1.4473	0.564314	16.1222
0	0	0	0	1	0	0	4.3945	1.03833	1.14608	0.494259	16.6462
0	0	0	0	1	0	0	4.51549	1.00315	1.06727	0.381777	16.6757
0	0	0	0	1	0	0	3.31217	1.02927	1.31689	0.268462	16.2035
0	0	0	0	1	0	0	4.09063	1.11105	1.42375	0.404172	16.2688
0	0	0	0	0	1	0	3.96316	1.26612	4.83045	0.332471	8.04583
0	0	0	0	0	1	0	4.56643	1.24861	14.14	0.47539	8.78264
0	0	0	0	0	1	0	5.25134	1.31666	26.07	0.580255	9.18611
0	0	0	0	0	1	0	6.8152	1.30442	44.0976	0.573926	9.92292
0	0	0	0	0	1	0	6.43866	1.35415	52.228	0.523318	10.2458
0	0	0	0	0	1	0	6.08439	1.32442	50.4855	0.511773	10.2764
0	0	0	0	0	1	0	5.86774	1.32193	58.9697	0.517248	10.434
0	0	0	0	0	1	0	6.0592	1.31406	69.7409	0.494653	10.2417
0	0	0	0	0	1	0	6.46784	1.33184	67.7113	0.685617	10.4611
0	0	0	0	0	1	0	6.36449	1.365	73.0028	0.598533	10.7222
0	0	0	0	0	1	0	6.3131	1.36609	59.7892	0.684155	10.5889
0	0	0	0	0	1	0	6.29563	1.41589	51.2372	0.716497	10.7694
0	0	0	0	0	1	0	6.77828	1.47033	31.9426	0.691878	10.5799
0	0	0	0	0	1	0	6.89748	1.39812	15.1003	0.585756	10.4819
0	0	0	0	0	1	0	7.21518	1.38966	5.86015	0.558297	10.3257
0	0	0	0	0	1	0	6.62358	1.38538	3.03769	0.604654	10.4875
0	0	0	0	0	1	0	6.28338	1.38417	2.65352	0.505199	10.9743
0	0	0	0	0	1	0	6.71736	1.42842	2.55747	0.484236	11.0881
0	0	0	0	0	1	0	7.32169	1.45656	2.58388	0.622846	11.6326
0	0	0	0	0	1	0	7.32722	1.41838	2.51444	0.582839	11.9646
0	0	0	0	0	1	0	8.11284	1.43538	2.62578	0.705907	12.4382
0	0	0	0	0	1	0	8.01199	1.44687	2.89696	0.627753	13.3187
0	0	0	0	0	1	0	7.12446	1.45353	3.53497	0.729905	13.7299
0	0	0	0	0	1	0	7.62125	1.52048	3.46919	0.906528	14.0528
0	0	0	0	0	1	0	8.72443	1.43624	3.13957	0.879069	14.7444
0	0	0	0	0	1	0	8.28354	1.42708	3.14838	0.710532	15.6208
0	0	0	0	0	1	0	9.84082	1.45485	3.45407	0.941529	16.0014
0	0	0	0	0	1	0	9.75348	1.46679	3.16936	0.794661	16.7222
0	0	0	0	0	1	0	9.67491	1.63862	3.7616	0.923645	17.0097
0	0	0	0	0	1	0	8.11615	1.35853	2.9932	0.709943	17.0542
0	0	0	0	0	1	0	6.54525	1.12126	2.03857	0.419841	17.4292
0	0	0	0	0	1	0	7.74781	1.14023	2.17887	0.576601	17.3285
0	0	0	0	0	1	0	6.55692	1.15208	1.77806	0.363785	16.909
0	0	0	0	0	1	0	8.42887	1.23541	1.96629	0.539089	16.6486
0	0	0	0	0	1	0	8.26109	1.30762	2.14586	0.680196	16.1306
0	0	0	0	0	1	0	6.91811	1.34693	2.38409	0.796015	16.3438
0	0	0	0	0	1	0	7.23949	1.42014	2.78523	0.644019	16.6757
0	0	0	0	0	1	0	7.32276	1.35134	2.37125	0.560972	16.2035
0	0	0	0	0	1	0	7.80295	1.24996	2.43987	0.72575	16.1687
0	0	0	0	0	0	1	4.13166	1.03709	13.2624	0.289269	7.69167
0	0	0	0	0	0	1	4.8807	1.11751	29.2527	0.356413	8.04583
0	0	0	0	0	0	1	5.41395	1.19358	36.2611	0.414575	8.96458
0	0	0	0	0	0	1	5.46942	1.25699	41.3778	0.437685	9.18611
0	0	0	0	0	0	1	6.45157	1.35348	51.6407	0.514974	9.92292
0	0	0	0	0	0	1	7.02407	1.36237	55.7635	0.770142	10.2458
0	0	0	0	0	0	1	6.58051	1.34201	45.4563	2.2209	10.3063
0	0	0	0	0	0	1	6.20377	1.33427	48.9072	0.866529	10.434
0	0	0	0	0	0	1	6.35798	1.3467	38.4259	0.974289	10.4415
0	0	0	0	0	0	1	6.34452	1.3457	34.5628	0.874521	10.3699
0	0	0	0	0	0	1	6.26584	1.32798	22.7175	0.844305	10.6368
0	0	0	0	0	0	1	5.92751	1.33517	17.5615	0.688633	10.691
0	0	0	0	0	0	1	6.4044	1.32401	13.5392	0.886947	10.5889
0	0	0	0	0	0	1	5.99568	1.3558	9.27015	0.718322	10.7694
0	0	0	0	0	0	1	5.83788	1.36824	6.72936	0.690258	10.5799
0	0	0	0	0	0	1	5.42926	1.32108	3.8202	0.549165	10.6069
0	0	0	0	0	0	1	5.5109	1.31478	2.86227	0.615451	10.3257
0	0	0	0	0	0	1	6.55282	1.3533	2.61247	0.785687	10.3569
0	0	0	0	0	0	1	7.59286	1.37402	2.45193	0.870451	10.9743
0	0	0	0	0	0	1	8.19067	1.42112	2.57344	0.8668	10.9875
0	0	0	0	0	0	1	8.00096	1.46404	2.83631	0.907106	11.3826
0	0	0	0	0	0	1	5.62216	1.41639	2.87375	0.759328	11.8486
0	0	0	0	0	0	1	5.81775	1.40946	3.18352	0.820474	11.9646
0	0	0	0	0	0	1	6.73201	1.40555	3.11913	0.86647	12.4382
0	0	0	0	0	0	1	7.53351	1.40545	2.97526	1.02585	12.9104
0	0	0	0	0	0	1	7.40584	1.425	2.97748	1.09976	13.7299
0	0	0	0	0	0	1	7.78271	1.35736	2.69756	1.38602	14.0528
0	0	0	0	0	0	1	9.40942	1.35379	2.89304	1.74035	14.7444
0	0	0	0	0	0	1	10.4729	1.39899	3.5384	2.07907	15.1472
0	0	0	0	0	0	1	9.74755	1.34837	3.54688	1.73614	15.8944
0	0	0	0	0	0	1	9.26055	1.32046	3.56968	1.62732	16.3208
0	0	0	0	0	0	1	7.91185	1.26656	3.25824	1.15675	16.7222
0	0	0	0	0	0	1	8.03725	1.27536	3.0148	1.02702	17.0097
0	0	0	0	0	0	1	7.8269	1.30232	2.66451	0.964478	17.0542
0	0	0	0	0	0	1	7.34385	1.28274	2.48401	0.76212	17.4292
0	0	0	0	0	0	1	7.54556	1.29556	2.34122	0.867004	17.5132
0	0	0	0	0	0	1	7.58391	1.27794	2.4809	0.729483	17.3285
0	0	0	0	0	0	1	9.18641	1.32092	2.41045	0.775292	16.6486
0	0	0	0	0	0	1	9.62576	1.30688	2.28445	0.678337	16.3639
0	0	0	0	0	0	1	9.02449	1.2522	2.0433	0.524401	16.1222
0	0	0	0	0	0	1	7.81396	1.20774	1.91322	0.37516	16.3438
0	0	0	0	0	0	1	7.87358	1.17652	1.92278	0.349178	16.4208
0	0	0	0	0	0	1	6.88934	1.19684	1.9215	0.484061	16.2035

## Sheet: test knokke
1	0	0	0	0	0	0	3.2529	1.10134	14.9058	0.316187	7.69167
1	0	0	0	0	0	0	3.24066	1.16114	21.5625	0.313487	8.04583
1	0	0	0	0	0	0	3.81352	1.21188	27.982	0.336061	8.47639
1	0	0	0	0	0	0	3.77318	1.25731	32.0862	0.273825	8.96458
1	0	0	0	0	0	0	5.42762	1.23039	28.7804	0.41615	9.18611
1	0	0	0	0	0	0	5.30156	1.22362	28.6061	0.315791	9.51528
1	0	0	0	0	0	0	6.19122	1.23611	30.5757	0.363587	9.92292
1	0	0	0	0	0	0	5.28004	1.25395	33.5587	0.412039	10.2458
1	0	0	0	0	0	0	5.07321	1.27723	34.694	0.385728	10.2826
1	0	0	0	0	0	0	5.80388	1.28297	36.0678	0.497171	10.3063
1	0	0	0	0	0	0	6.16055	1.3052	35.7989	0.622934	10.434
1	0	0	0	0	0	0	6.04414	1.31142	34.4428	1.51103	10.4415
1	0	0	0	0	0	0	6.09473	1.3035	29.0469	0.652449	10.2417
1	0	0	0	0	0	0	5.67145	1.2724	30.025	0.51492	10.3699
1	0	0	0	0	0	0	5.90151	1.27799	24.2604	0.450719	10.6368
1	0	0	0	0	0	0	6.1741	1.27593	15.6078	0.491138	10.7222
1	0	0	0	0	0	0	6.58548	1.26154	7.94517	0.60448	10.691
1	0	0	0	0	0	0	6.48993	1.30851	5.8303	0.568414	10.5889
1	0	0	0	0	0	0	6.52306	1.30881	4.01565	0.528945	10.634
1	0	0	0	0	0	0	6.40037	1.32639	2.89725	0.516325	10.7694
1	0	0	0	0	0	0	6.38325	1.33575	2.32657	0.631698	10.5799
1	0	0	0	0	0	0	7.01142	1.33092	2.236	0.718104	10.6069
1	0	0	0	0	0	0	6.23172	1.30507	2.14669	0.527145	10.4819
1	0	0	0	0	0	0	6.93752	1.33487	2.06092	0.640313	10.3257
1	0	0	0	0	0	0	6.95735	1.33135	1.99631	0.635634	10.3569
1	0	0	0	0	0	0	6.49191	1.31631	1.97559	0.552135	10.7361
1	0	0	0	0	0	0	6.64288	1.30409	2.01893	0.69925	10.9743
1	0	0	0	0	0	0	6.46787	1.25656	1.86006	0.46772	10.9875
1	0	0	0	0	0	0	6.78994	1.2999	2.11104	0.521697	11.0881
1	0	0	0	0	0	0	6.63297	1.27582	2.09556	0.475708	11.3826
1	0	0	0	0	0	0	6.94517	1.30156	2.30785	0.520571	11.8486
1	0	0	0	0	0	0	7.99124	1.35407	2.70789	0.654468	11.9646
1	0	0	0	0	0	0	8.1149	1.35525	2.98106	0.63873	12.059
1	0	0	0	0	0	0	7.74642	1.32608	2.89318	0.522116	12.4382
1	0	0	0	0	0	0	7.58422	1.34521	2.85198	0.62077	12.9104
1	0	0	0	0	0	0	7.48288	1.36058	3.01354	0.569515	13.3187
1	0	0	0	0	0	0	7.56591	1.33281	3.17422	0.495815	13.7299
1	0	0	0	0	0	0	8.87425	1.34492	3.04888	0.816949	14.0528
1	0	0	0	0	0	0	8.54483	1.36421	2.91419	0.70679	14.3187
1	0	0	0	0	0	0	9.99448	1.38714	3.33717	0.823696	14.7444
1	0	0	0	0	0	0	10.3006	1.39866	3.1484	0.804297	15.1472
1	0	0	0	0	0	0	9.709	1.39784	3.08953	0.848161	15.8944
1	0	0	0	0	0	0	9.90453	1.35286	2.97028	0.812776	16.0014
1	0	0	0	0	0	0	10.6812	1.35965	3.04046	1.02803	16.3208
1	0	0	0	0	0	0	10.2006	1.35031	2.92561	0.916996	16.7222
1	0	0	0	0	0	0	9.5657	1.34442	2.89885	0.840237	16.9611
1	0	0	0	0	0	0	10.1513	1.34002	2.36854	0.913394	17.0097
1	0	0	0	0	0	0	11.0995	1.3326	2.24456	0.924481	17.0542
1	0	0	0	0	0	0	11.6003	1.32763	2.11723	0.983763	17.2333
1	0	0	0	0	0	0	10.5566	1.35882	2.10193	0.800736	17.4292
1	0	0	0	0	0	0	9.89461	1.32223	2.19657	0.8036	17.5132
1	0	0	0	0	0	0	8.88838	1.3022	2.35774	0.629646	17.3285
1	0	0	0	0	0	0	7.47911	1.2663	1.82592	0.608467	16.909
1	0	0	0	0	0	0	6.54912	1.20259	2.19195	0.458236	16.6486
1	0	0	0	0	0	0	6.20275	1.18958	1.75802	0.594707	16.3639
1	0	0	0	0	0	0	5.57069	1.13697	1.50337	0.311358	16.1306
1	0	0	0	0	0	0	4.89113	1.08894	1.52209	0.274824	16.1222
1	0	0	0	0	0	0	4.69252	1.0831	1.39993	0.274261	16.3438
1	0	0	0	0	0	0	4.72792	1.06196	1.42443	0.326472	16.6757
1	0	0	0	0	0	0	5.74667	1.10147	1.5506	0.396622	16.4208
1	0	0	0	0	0	0	5.68799	1.11847	1.60436	0.408964	16.2035
0	1	0	0	0	0	0	3.7561	1.11376	31.3027	0.213735	7.69167
0	1	0	0	0	0	0	6.17638	1.15517	54.803	0.478704	8.04583
0	1	0	0	0	0	0	6.24634	1.17572	55.0361	0.49785	8.47639
0	1	0	0	0	0	0	6.71592	1.21146	54.5788	0.62952	8.78264
0	1	0	0	0	0	0	6.79896	1.20615	58.7527	0.668247	9.18611
0	1	0	0	0	0	0	6.80576	1.19161	35.2994	0.74629	9.51528
0	1	0	0	0	0	0	6.97167	1.22177	30.3017	0.772644	9.92292
0	1	0	0	0	0	0	6.41567	1.22403	40.8111	0.743144	10.2458
0	1	0	0	0	0	0	6.43033	1.2706	49.3199	0.719827	10.2826
0	1	0	0	0	0	0	6.39936	1.31763	55.2324	0.685884	10.2764
0	1	0	0	0	0	0	6.9129	1.23895	12.2241	0.747291	10.3063
0	1	0	0	0	0	0	7.22849	1.22997	7.54507	0.81902	10.4415
0	1	0	0	0	0	0	7.15734	1.27296	4.33977	0.754142	10.2417
0	1	0	0	0	0	0	7.25234	1.25602	4.00291	0.717948	10.3699
0	1	0	0	0	0	0	7.18695	1.26807	3.93021	0.648861	10.4611
0	1	0	0	0	0	0	6.94725	1.31861	4.62419	0.583115	10.6368
0	1	0	0	0	0	0	7.20629	1.33322	4.12457	0.668687	10.7222
0	1	0	0	0	0	0	6.73623	1.24657	2.31671	0.581847	10.691
0	1	0	0	0	0	0	6.94898	1.2754	2.12989	0.666469	10.634
0	1	0	0	0	0	0	6.65673	1.24795	1.98503	0.51653	10.7694
0	1	0	0	0	0	0	6.42724	1.2665	1.96346	0.40804	10.6174
0	1	0	0	0	0	0	6.36652	1.33758	2.02532	0.428001	10.5799
0	1	0	0	0	0	0	5.98888	1.22198	1.76999	0.441568	10.6069
0	1	0	0	0	0	0	5.97591	1.23777	2.07213	0.40602	10.4819
0	1	0	0	0	0	0	5.95949	1.23686	1.82612	0.387334	10.3257
0	1	0	0	0	0	0	5.78621	1.25835	1.98928	0.442945	10.4875
0	1	0	0	0	0	0	6.13578	1.27623	2.05658	0.390528	10.7361
0	1	0	0	0	0	0	6.43001	1.28116	2.25788	0.471606	10.9743
0	1	0	0	0	0	0	6.28756	1.26033	2.32206	0.412453	10.9875
0	1	0	0	0	0	0	6.9514	1.29196	2.5505	0.588892	11.0881
0	1	0	0	0	0	0	7.01506	1.30044	2.73088	0.582725	11.3826
0	1	0	0	0	0	0	7.41541	1.35896	3.29746	0.755982	11.8486
0	1	0	0	0	0	0	8.48563	1.37413	3.48197	0.859779	11.9646
0	1	0	0	0	0	0	9.04921	1.38037	4.32835	1.07555	12.059
0	1	0	0	0	0	0	8.91805	1.39529	4.29319	0.984756	12.4382
0	1	0	0	0	0	0	9.48984	1.39872	4.63904	1.05477	12.9104
0	1	0	0	0	0	0	9.36549	1.40275	4.50398	0.91882	13.3187
0	1	0	0	0	0	0	9.55638	1.42714	4.86705	0.751264	13.5174
0	1	0	0	0	0	0	10.3891	1.40252	5.33306	0.757071	14.0528
0	1	0	0	0	0	0	9.41534	1.38809	4.71164	0.645862	14.3187
0	1	0	0	0	0	0	10.1019	1.37397	3.75522	0.787976	14.7444
0	1	0	0	0	0	0	11.0026	1.34016	3.21763	1.12385	15.1472
0	1	0	0	0	0	0	11.2001	1.37689	3.18247	1.38753	15.6208
0	1	0	0	0	0	0	10.9749	1.33794	2.57768	1.16913	15.8944
0	1	0	0	0	0	0	11.0933	1.34819	2.45129	0.946039	16.0014
0	1	0	0	0	0	0	10.0302	1.33153	2.4368	0.863315	16.7222
0	1	0	0	0	0	0	10.5593	1.33613	2.57475	0.830268	16.9611
0	1	0	0	0	0	0	10.2623	1.31079	2.14405	0.731328	17.0097
0	1	0	0	0	0	0	10.8943	1.38435	2.51296	1.02048	17.034
0	1	0	0	0	0	0	9.95702	1.32623	2.2557	0.895707	17.0542
0	1	0	0	0	0	0	10.5223	1.36336	2.55135	0.830502	17.2333
0	1	0	0	0	0	0	8.5762	1.35758	2.34532	0.64183	17.4292
0	1	0	0	0	0	0	8.08682	1.28429	2.12596	0.63308	17.3285
0	1	0	0	0	0	0	6.90777	1.26807	1.95906	0.430811	17.1076
0	1	0	0	0	0	0	6.17939	1.20135	1.89722	0.484969	16.909
0	1	0	0	0	0	0	5.07986	1.2444	2.25764	0.43755	16.6486
0	1	0	0	0	0	0	6.244	1.23175	1.90349	0.395222	16.3639
0	1	0	0	0	0	0	6.17394	1.13714	1.53061	0.278273	16.1306
0	1	0	0	0	0	0	7.59734	1.18528	1.6359	0.484848	16.1222
0	1	0	0	0	0	0	8.12631	1.22935	2.8236	0.571091	16.6462
0	1	0	0	0	0	0	7.60819	1.26885	2.03786	0.652138	16.6757
0	1	0	0	0	0	0	7.07506	1.24526	1.89739	0.603	16.4208
0	1	0	0	0	0	0	6.43471	1.23187	2.0715	0.608097	16.2035
0	0	1	0	0	0	0	3.77723	1.14684	10.8255	0.50178	7.69167
0	0	1	0	0	0	0	4.75326	1.15265	20.3037	0.436539	8.04583
0	0	1	0	0	0	0	5.95901	1.19593	25.1624	0.359095	8.78264
0	0	1	0	0	0	0	5.91314	1.20665	27.714	0.498082	8.96458
0	0	1	0	0	0	0	6.37141	1.20324	27.3362	0.357117	9.18611
0	0	1	0	0	0	0	6.55942	1.20309	27.9414	0.498174	9.92292
0	0	1	0	0	0	0	6.6464	1.23498	30.5961	0.518567	10.2458
0	0	1	0	0	0	0	7.60386	1.2578	35.1468	0.720978	10.2826
0	0	1	0	0	0	0	7.72386	1.24198	33.4341	0.793055	10.3063
0	0	1	0	0	0	0	7.64213	1.28871	35.1016	0.782543	10.434
0	0	1	0	0	0	0	7.48327	1.29438	33.1374	0.863228	10.4415
0	0	1	0	0	0	0	7.42687	1.29903	25.0078	0.87318	10.2417
0	0	1	0	0	0	0	7.55119	1.36588	20.355	0.867039	10.4611
0	0	1	0	0	0	0	7.80923	1.34536	21.36	0.808397	10.6368
0	0	1	0	0	0	0	7.09849	1.3538	14.6159	0.740093	10.7222
0	0	1	0	0	0	0	7.20434	1.36537	9.09961	0.841462	10.5889
0	0	1	0	0	0	0	7.89663	1.38864	7.13959	0.936363	10.634
0	0	1	0	0	0	0	7.72677	1.39267	5.05262	0.791181	10.7694
0	0	1	0	0	0	0	7.4101	1.45195	3.89624	0.788696	10.5799
0	0	1	0	0	0	0	8.51592	1.49086	2.33362	1.09926	10.3569
0	0	1	0	0	0	0	9.07594	1.44836	2.39066	1.30192	10.4875
0	0	1	0	0	0	0	8.99889	1.47126	2.50321	1.18642	10.7361
0	0	1	0	0	0	0	8.44202	1.44769	2.49671	1.10221	10.9875
0	0	1	0	0	0	0	8.40036	1.46583	2.51205	0.96123	11.0881
0	0	1	0	0	0	0	8.29239	1.43671	2.46106	0.893025	11.3826
0	0	1	0	0	0	0	7.93835	1.46348	2.74046	0.930933	11.8486
0	0	1	0	0	0	0	8.50626	1.40093	2.94868	0.922926	11.9646
0	0	1	0	0	0	0	8.52058	1.44273	3.14293	0.95746	12.059
0	0	1	0	0	0	0	7.81562	1.42958	3.33422	0.761067	12.4382
0	0	1	0	0	0	0	7.20071	1.40828	3.21417	0.633302	13.3187
0	0	1	0	0	0	0	7.50246	1.56032	3.58277	0.826754	13.5174
0	0	1	0	0	0	0	8.7962	1.4137	3.18922	0.621963	13.7299
0	0	1	0	0	0	0	8.94119	1.53782	3.90311	0.954613	14.3187
0	0	1	0	0	0	0	9.05725	1.525	3.73699	0.996089	14.7444
0	0	1	0	0	0	0	10.3119	1.37558	3.28755	0.830584	15.1472
0	0	1	0	0	0	0	10.3916	1.39999	3.28523	0.844957	15.8944
0	0	1	0	0	0	0	10.4527	1.54879	4.1463	1.06492	16.0014
0	0	1	0	0	0	0	8.6306	1.38789	3.52692	0.864404	16.3208
0	0	1	0	0	0	0	10.281	1.43026	3.53998	1.2183	16.9611
0	0	1	0	0	0	0	11.0781	1.35746	3.24024	1.15693	17.0097
0	0	1	0	0	0	0	11.1531	1.38487	3.44471	1.31374	17.034
0	0	1	0	0	0	0	11.0348	1.34085	2.81032	1.29488	17.2333
0	0	1	0	0	0	0	11.6864	1.29107	1.99708	1.40799	17.4292
0	0	1	0	0	0	0	12.6628	1.31834	1.88361	1.68042	17.5132
0	0	1	0	0	0	0	12.5871	1.35003	1.93957	1.52	17.3285
0	0	1	0	0	0	0	12.1052	1.39553	1.98423	1.33477	16.909
0	0	1	0	0	0	0	10.9245	1.41851	2.19915	1.2068	16.6486
0	0	1	0	0	0	0	10.3177	1.48484	2.30832	0.967669	16.3639
0	0	1	0	0	0	0	9.14344	1.50723	2.61257	0.706383	16.1222
0	0	1	0	0	0	0	9.19084	1.47218	2.42857	0.480287	16.3438
0	0	1	0	0	0	0	4.92956	1.32007	1.98856	0.413746	16.6462
0	0	1	0	0	0	0	3.90118	1.30164	1.90373	0.410054	16.4208
0	0	1	0	0	0	0	4.95648	1.34559	2.26228	0.586454	16.2035
0	0	0	1	0	0	0	3.13838	1.09736	7.75538	0.524205	8.04583
0	0	0	1	0	0	0	3.4184	1.14142	14.7104	0.38964	8.47639
0	0	0	1	0	0	0	3.96775	1.19018	22.7386	0.376693	8.96458
0	0	0	1	0	0	0	5.17869	1.28717	30.3963	0.442066	9.18611
0	0	0	1	0	0	0	6.07068	1.31527	34.6737	0.60665	9.92292
0	0	0	1	0	0	0	6.80572	1.34268	40.7159	0.722689	10.2458
0	0	0	1	0	0	0	7.09912	1.37367	47.8749	0.814225	10.2764
0	0	0	1	0	0	0	7.29338	1.41036	48.3633	0.973105	10.434
0	0	0	1	0	0	0	6.91775	1.44209	49.2282	0.872023	10.4415
0	0	0	1	0	0	0	6.45281	1.44356	49.2494	1.00952	10.3699
0	0	0	1	0	0	0	6.72633	1.48898	27.6402	0.991925	10.4611
0	0	0	1	0	0	0	7.1322	1.4269	11.3893	1.18406	10.7222
0	0	0	1	0	0	0	6.40984	1.448	4.4889	1.14306	10.691
0	0	0	1	0	0	0	5.73821	1.34743	2.86651	0.904451	10.634
0	0	0	1	0	0	0	4.9989	1.15906	2.18198	0.514391	10.7694
0	0	0	1	0	0	0	5.66357	1.12768	2.24144	0.540259	10.5799
0	0	0	1	0	0	0	5.82267	1.22326	2.81484	0.584618	10.4819
0	0	0	1	0	0	0	7.13379	1.29782	3.23706	0.642397	10.3257
0	0	0	1	0	0	0	8.08658	1.41062	3.75365	0.764895	10.4875
0	0	0	1	0	0	0	9.62209	1.4429	4.36167	0.894892	10.7361
0	0	0	1	0	0	0	10.5335	1.51201	4.95442	1.01306	10.9875
0	0	0	1	0	0	0	9.80522	1.48588	4.68693	0.815989	11.0881
0	0	0	1	0	0	0	10.7345	1.51509	4.55804	1.00266	11.6326
0	0	0	1	0	0	0	11.1439	1.49391	4.30428	0.842792	11.9646
0	0	0	1	0	0	0	10.9555	1.50149	3.98589	0.640563	12.059
0	0	0	1	0	0	0	10.617	1.49484	3.78954	0.704653	12.9104
0	0	0	1	0	0	0	12.1698	1.49661	3.36903	0.813618	13.3187
0	0	0	1	0	0	0	11.9985	1.46963	2.86395	0.805949	13.7299
0	0	0	1	0	0	0	11.6618	1.4569	2.59112	0.721527	14.0528
0	0	0	1	0	0	0	12.5965	1.47221	2.75129	0.770491	14.7444
0	0	0	1	0	0	0	12.3391	1.46709	2.57475	0.655787	15.6208
0	0	0	1	0	0	0	12.1293	1.47682	2.5656	0.557885	15.8944
0	0	0	1	0	0	0	11.3316	1.43835	2.37864	0.586979	16.3208
0	0	0	1	0	0	0	10.2075	1.42223	2.24402	0.618927	16.7222
0	0	0	1	0	0	0	10.1241	1.4008	2.26778	0.739478	17.0097
0	0	0	1	0	0	0	9.60137	1.39418	2.20248	0.669122	17.034
0	0	0	1	0	0	0	9.31857	1.36143	2.17637	1.02527	17.2333
0	0	0	1	0	0	0	9.08799	1.318	1.98123	0.689744	17.4292
0	0	0	1	0	0	0	8.51971	1.2817	2.03915	0.52309	17.3285
0	0	0	1	0	0	0	7.30665	1.23753	1.83058	0.685325	16.909
0	0	0	1	0	0	0	6.65019	1.22799	1.87808	0.565704	16.6486
0	0	0	1	0	0	0	6.20795	1.17428	1.72258	0.36076	16.1306
0	0	0	1	0	0	0	5.65208	1.21591	1.80619	0.407756	16.1222
0	0	0	1	0	0	0	4.64773	1.1037	1.6412	0.354778	16.6462
0	0	0	1	0	0	0	5.29239	1.0951	1.70221	0.369058	16.6757
0	0	0	1	0	0	0	5.27108	1.07917	1.97544	0.339189	16.2035
0	0	0	0	1	0	0	4.13314	1.11632	3.72961	0.214771	8.04583
0	0	0	0	1	0	0	3.99583	1.02423	10.3294	0.303648	8.47639
0	0	0	0	1	0	0	5.01958	1.11029	27.0625	0.366094	8.96458
0	0	0	0	1	0	0	5.11141	1.14105	30.6015	0.295775	9.18611
0	0	0	0	1	0	0	5.29771	1.17981	34.4969	0.327519	9.92292
0	0	0	0	1	0	0	5.40015	1.20632	43.2549	0.389867	10.2458
0	0	0	0	1	0	0	5.7574	1.1961	45.1943	0.402853	10.2764
0	0	0	0	1	0	0	6.06959	1.23279	55.0442	0.493878	10.434
0	0	0	0	1	0	0	6.06504	1.25252	57.1118	0.504041	10.4415
0	0	0	0	1	0	0	6.05891	1.25317	58.6531	0.607567	10.3699
0	0	0	0	1	0	0	5.71845	1.22757	52.2341	0.602183	10.4611
0	0	0	0	1	0	0	5.89198	1.23838	46.1517	0.580014	10.7222
0	0	0	0	1	0	0	5.83538	1.2036	31.0487	0.607234	10.691
0	0	0	0	1	0	0	6.0246	1.24534	22.9111	0.609593	10.634
0	0	0	0	1	0	0	5.88053	1.23272	11.8389	0.638316	10.7694
0	0	0	0	1	0	0	5.82878	1.26654	8.08795	0.593794	10.5799
0	0	0	0	1	0	0	5.73227	1.28576	5.00059	0.601794	10.4819
0	0	0	0	1	0	0	5.6601	1.25603	3.32086	0.496124	10.3257
0	0	0	0	1	0	0	6.00259	1.25848	2.2629	0.688809	10.4875
0	0	0	0	1	0	0	5.93828	1.29004	2.07012	0.893573	10.7361
0	0	0	0	1	0	0	5.9007	1.29342	1.93305	0.584133	10.9875
0	0	0	0	1	0	0	6.29869	1.28777	1.80044	0.666495	11.0881
0	0	0	0	1	0	0	6.6598	1.29563	1.96161	0.743906	11.6326
0	0	0	0	1	0	0	6.40148	1.2795	1.84865	0.628668	11.9646
0	0	0	0	1	0	0	5.89365	1.26039	1.89893	0.522528	12.059
0	0	0	0	1	0	0	5.41654	1.26532	2.02767	0.508855	12.9104
0	0	0	0	1	0	0	6.43199	1.30655	2.53378	0.686306	13.3187
0	0	0	0	1	0	0	7.02014	1.30636	2.74146	0.604436	13.7299
0	0	0	0	1	0	0	7.43195	1.33666	2.96667	0.692368	14.0528
0	0	0	0	1	0	0	7.97487	1.446	3.6917	0.879497	14.7444
0	0	0	0	1	0	0	8.99831	1.30724	3.71087	1.14501	15.6208
0	0	0	0	1	0	0	8.58598	1.25271	2.96793	0.982919	15.8944
0	0	0	0	1	0	0	8.76136	1.33459	3.06177	0.964125	16.3208
0	0	0	0	1	0	0	8.49105	1.36394	3.47873	1.11067	16.7222
0	0	0	0	1	0	0	8.31784	1.3315	3.29621	1.06861	17.0097
0	0	0	0	1	0	0	8.63625	1.28119	2.38641	0.932563	17.034
0	0	0	0	1	0	0	8.19637	1.29631	2.3827	1.02194	17.2333
0	0	0	0	1	0	0	8.76317	1.29458	2.12742	1.0104	17.4292
0	0	0	0	1	0	0	7.97044	1.29388	2.01009	0.990066	17.3285
0	0	0	0	1	0	0	8.0642	1.27015	1.81608	1.03294	16.909
0	0	0	0	1	0	0	7.38588	1.23914	1.73146	0.707825	16.6486
0	0	0	0	1	0	0	6.56532	1.18906	1.56514	0.623672	16.1306
0	0	0	0	1	0	0	5.38237	1.12589	1.4473	0.564314	16.1222
0	0	0	0	1	0	0	4.3945	1.03833	1.14608	0.494259	16.6462
0	0	0	0	1	0	0	4.51549	1.00315	1.06727	0.381777	16.6757
0	0	0	0	1	0	0	3.31217	1.02927	1.31689	0.268462	16.2035
0	0	0	0	1	0	0	4.09063	1.11105	1.42375	0.404172	16.2688
0	0	0	0	0	1	0	3.96316	1.26612	4.83045	0.332471	8.04583
0	0	0	0	0	1	0	4.56643	1.24861	14.14	0.47539	8.78264
0	0	0	0	0	1	0	5.25134	1.31666	26.07	0.580255	9.18611
0	0	0	0	0	1	0	6.8152	1.30442	44.0976	0.573926	9.92292
0	0	0	0	0	1	0	6.43866	1.35415	52.228	0.523318	10.2458
0	0	0	0	0	1	0	6.08439	1.32442	50.4855	0.511773	10.2764
0	0	0	0	0	1	0	5.86774	1.32193	58.9697	0.517248	10.434
0	0	0	0	0	1	0	6.0592	1.31406	69.7409	0.494653	10.2417
0	0	0	0	0	1	0	6.46784	1.33184	67.7113	0.685617	10.4611
0	0	0	0	0	1	0	6.36449	1.365	73.0028	0.598533	10.7222
0	0	0	0	0	1	0	6.3131	1.36609	59.7892	0.684155	10.5889
0	0	0	0	0	1	0	6.29563	1.41589	51.2372	0.716497	10.7694
0	0	0	0	0	1	0	6.77828	1.47033	31.9426	0.691878	10.5799
0	0	0	0	0	1	0	6.89748	1.39812	15.1003	0.585756	10.4819
0	0	0	0	0	1	0	7.21518	1.38966	5.86015	0.558297	10.3257
0	0	0	0	0	1	0	6.62358	1.38538	3.03769	0.604654	10.4875
0	0	0	0	0	1	0	6.28338	1.38417	2.65352	0.505199	10.9743
0	0	0	0	0	1	0	6.71736	1.42842	2.55747	0.484236	11.0881
0	0	0	0	0	1	0	7.32169	1.45656	2.58388	0.622846	11.6326
0	0	0	0	0	1	0	7.32722	1.41838	2.51444	0.582839	11.9646
0	0	0	0	0	1	0	8.11284	1.43538	2.62578	0.705907	12.4382
0	0	0	0	0	1	0	8.01199	1.44687	2.89696	0.627753	13.3187
0	0	0	0	0	1	0	7.12446	1.45353	3.53497	0.729905	13.7299
0	0	0	0	0	1	0	7.62125	1.52048	3.46919	0.906528	14.0528
0	0	0	0	0	1	0	8.72443	1.43624	3.13957	0.879069	14.7444
0	0	0	0	0	1	0	8.28354	1.42708	3.14838	0.710532	15.6208
0	0	0	0	0	1	0	9.84082	1.45485	3.45407	0.941529	16.0014
0	0	0	0	0	1	0	9.75348	1.46679	3.16936	0.794661	16.7222
0	0	0	0	0	1	0	9.67491	1.63862	3.7616	0.923645	17.0097
0	0	0	0	0	1	0	8.11615	1.35853	2.9932	0.709943	17.0542
0	0	0	0	0	1	0	6.54525	1.12126	2.03857	0.419841	17.4292
0	0	0	0	0	1	0	7.74781	1.14023	2.17887	0.576601	17.3285
0	0	0	0	0	1	0	6.55692	1.15208	1.77806	0.363785	16.909
0	0	0	0	0	1	0	8.42887	1.23541	1.96629	0.539089	16.6486
0	0	0	0	0	1	0	8.26109	1.30762	2.14586	0.680196	16.1306
0	0	0	0	0	1	0	6.91811	1.34693	2.38409	0.796015	16.3438
0	0	0	0	0	1	0	7.23949	1.42014	2.78523	0.644019	16.6757
0	0	0	0	0	1	0	7.32276	1.35134	2.37125	0.560972	16.2035
0	0	0	0	0	1	0	7.80295	1.24996	2.43987	0.72575	16.1687
0	0	0	0	0	0	1	3.66838	0.948768	0.691768	0.131052	7.66394
0	0	0	0	0	0	1	3.97725	0.917575	0.773904	0.613208	8.51182
0	0	0	0	0	0	1	2.61462	0.857357	0.597979	0.103061	6.6399
0	0	0	0	0	0	1	3.56452	1.04101	1.65273	0.258955	6.91434
0	0	0	0	0	0	1	3.07841	0.929425	0.844846	0.201889	6.76808
0	0	0	0	0	0	1	3.13399	1.07709	1.55741	0.157343	6.90131
0	0	0	0	0	0	1	3.2831	1.13511	3.47647	0.1826	7.46131
0	0	0	0	0	0	1	3.87046	1.251	2.87688	0.268995	7.70061
0	0	0	0	0	0	1	4.02344	1.31379	4.35841	0.365067	7.22636
0	0	0	0	0	0	1	4.36348	1.29718	4.10004	0.295967	7.85646
0	0	0	0	0	0	1	4.02959	1.28342	4.61948	0.634918	8.47919
0	0	0	0	0	0	1	4.66435	1.33326	4.55384	0.569337	7.90646
0	0	0	0	0	0	1	4.01008	1.27861	4.26466	0.683855	8.31626
0	0	0	0	0	0	1	4.43073	1.23243	5.055	0.60498	10.8028
0	0	0	0	0	0	1	4.47785	1.25388	11.1724	0.586971	9.48424
0	0	0	0	0	0	1	4.87374	1.29538	8.11432	0.577438	8.91172
0	0	0	0	0	0	1	5.35007	1.39123	8.0021	0.713331	8.78778
0	0	0	0	0	0	1	5.3729	1.37048	5.36361	0.826718	10.4153
0	0	0	0	0	0	1	5.38771	1.17287	1.02341	0.681242	11.4443
0	0	0	0	0	0	1	5.20402	1.16868	1.05536	0.575375	10.8032
0	0	0	0	0	0	1	5.94512	1.15375	1.11848	0.61136	10.723
0	0	0	0	0	0	1	5.4077	1.21079	1.328	0.561262	11.0057
0	0	0	0	0	0	1	5.68347	1.2096	1.20315	0.657196	11.8425
0	0	0	0	0	0	1	5.42369	1.29896	1.41978	0.55256	12.7551
0	0	0	0	0	0	1	4.34023	1.11296	1.40115	0.460783	14.1901
0	0	0	0	0	0	1	4.74512	1.10418	1.17517	0.393517	14.5088
0	0	0	0	0	0	1	5.67928	1.21108	1.47513	0.482212	13.6454
0	0	0	0	0	0	1	6.54554	1.22851	1.77726	0.59	14.1584
0	0	0	0	0	0	1	6.66402	1.22179	1.0223	0.646794	15.5755
0	0	0	0	0	0	1	6.38896	1.2051	0.817553	0.468712	15.461
0	0	0	0	0	0	1	6.00951	1.13315	0.679311	0.918258	15.1558
0	0	0	0	0	0	1	4.99342	1.03215	0.651932	0.554782	16.8539
0	0	0	0	0	0	1	5.14823	1.0501	0.766003	0.427023	16.9384
0	0	0	0	0	0	1	4.77525	1.03334	0.707229	0.336906	17.161
0	0	0	0	0	0	1	4.19141	1.0115	0.653926	0.269598	17.2138
0	0	0	0	0	0	1	4.55687	0.989514	0.60088	0.294336	16.8249
0	0	0	0	0	0	1	4.87734	1.05828	0.682723	0.328898	16.6231
0	0	0	0	0	0	1	4.61718	1.01358	0.687019	0.193238	16.683
0	0	0	0	0	0	1	5.16581	1.00536	0.714711	0.242996	16.8466
0	0	0	0	0	0	1	5.11151	0.988044	0.602174	0.240652	17.2475
0	0	0	0	0	0	1	4.68529	0.958882	0.835272	0.230639	17.5887
0	0	0	0	0	0	1	6.07485	1.00674	0.617117	0.272367	18.8761
0	0	0	0	0	0	1	4.74889	0.970681	0.585873	0.307531	19.8449
0	0	0	0	0	0	1	4.05552	0.916603	0.632006	0.26063	19.3807
0	0	0	0	0	0	1	3.91043	0.889567	0.654396	0.353985	19.2306
0	0	0	0	0	0	1	4.04586	0.875953	1.04391	0.214478	19.7115
0	0	0	0	0	0	1	3.52486	0.946366	0.720224	0.325134	20.8759
0	0	0	0	0	0	1	4.67006	1.06471	0.940875	0.243599	20.5058
